# Supplementary material for: Discovering cis-Regulatory RNAs in Shewanella Genomes by Support Vector Machines
Source: PLoS Comput Biol. 2009 Apr 3;5(4):e1000338. doi: 10.1371/journal.pcbi.1000338 (PMC2659441; doi:10.1371/journal.pcbi.1000338)
Supplement: Dataset S1 — Raw Data for ROC curves in Figure 1. (0.57 MB XLS) [file pcbi.1000338.s001.xls]

## Sheet: Raw data for ROC curves in Fig1
Dataset S1: Raw Data for ROC curves in Figure 1. FPR: Fasle Positive Rate; SEN: Sensitivity; _70_: results on test sets whose identities are lower than 70%
RNAz_FPR	RNAz_SEN	RNAz_70_FPR	RNAz_70_SEN	RSRNAz_FPR	RSRNAz_SEN	RSRNAz_70_FPR	RSRNAz_70_SEN	RSALNRNAz_FPR				P-value	Dynalign+LIBSVM_FPR	Dynalign+LIBSVM_SEN	Dynalign+LIBSVM_70_FPR	Dynalign+LIBSVM_70_SEN
0	0	0	0	0	0	0	0	0				1	0	0	0	0
0.001	0.128	0.001	0.108	0	0.462	0	0.509	0				0.999	0.018	0.248	0.011	0.204
0.001	0.158	0.001	0.129	0	0.497	0	0.542	0				0.998	0.018	0.248	0.011	0.204
0.001	0.179	0.001	0.147	0.001	0.518	0	0.566	0				0.997	0.019	0.257	0.011	0.211
0.001	0.195	0.001	0.162	0.001	0.534	0	0.579	0				0.996	0.02	0.271	0.011	0.223
0.001	0.208	0.001	0.173	0.002	0.54	0	0.586	0				0.995	0.02	0.281	0.011	0.231
0.001	0.221	0.001	0.184	0.002	0.55	0	0.596	0				0.994	0.021	0.293	0.012	0.242
0.002	0.237	0.001	0.204	0.002	0.558	0	0.605	0				0.993	0.021	0.3	0.012	0.249
0.002	0.249	0.001	0.217	0.002	0.566	0	0.611	0				0.992	0.022	0.307	0.012	0.255
0.002	0.257	0.001	0.222	0.002	0.574	0	0.621	0				0.991	0.023	0.313	0.012	0.261
0.002	0.266	0.001	0.233	0.002	0.578	0	0.625	0				0.99	0.023	0.319	0.013	0.266
0.002	0.274	0.001	0.242	0.002	0.581	0	0.627	0				0.989	0.024	0.325	0.013	0.272
0.002	0.276	0.001	0.244	0.002	0.586	0	0.634	0				0.988	0.025	0.33	0.013	0.277
0.002	0.28	0.001	0.248	0.002	0.592	0	0.637	0				0.987	0.025	0.335	0.013	0.282
0.002	0.289	0.001	0.257	0.002	0.601	0	0.647	0				0.986	0.025	0.339	0.013	0.285
0.002	0.295	0.001	0.263	0.003	0.607	0.001	0.652	0				0.985	0.026	0.342	0.014	0.288
0.002	0.302	0.001	0.268	0.003	0.612	0.001	0.656	0				0.984	0.026	0.346	0.014	0.291
0.002	0.305	0.001	0.272	0.003	0.614	0.001	0.659	0				0.983	0.026	0.347	0.014	0.293
0.002	0.309	0.001	0.275	0.003	0.62	0.001	0.664	0				0.982	0.027	0.353	0.014	0.299
0.002	0.314	0.001	0.281	0.003	0.626	0.001	0.67	0				0.981	0.027	0.357	0.014	0.303
0.002	0.322	0.001	0.285	0.003	0.631	0.001	0.675	0				0.98	0.028	0.359	0.014	0.305
0.002	0.324	0.001	0.287	0.003	0.634	0.001	0.677	0.001				0.979	0.028	0.361	0.015	0.307
0.002	0.329	0.001	0.292	0.003	0.636	0.001	0.68	0.001				0.978	0.028	0.363	0.015	0.309
0.002	0.336	0.001	0.3	0.004	0.639	0.001	0.684	0.001				0.977	0.029	0.367	0.015	0.313
0.002	0.338	0.001	0.303	0.004	0.641	0.001	0.686	0.001				0.976	0.029	0.369	0.015	0.315
0.002	0.342	0.001	0.305	0.004	0.642	0.001	0.688	0.001				0.975	0.029	0.371	0.015	0.317
0.002	0.347	0.001	0.311	0.004	0.643	0.001	0.689	0.001				0.974	0.029	0.373	0.015	0.32
0.002	0.35	0.001	0.313	0.004	0.645	0.001	0.691	0.001				0.973	0.03	0.374	0.015	0.321
0.002	0.357	0.001	0.321	0.004	0.646	0.001	0.692	0.001				0.972	0.03	0.378	0.015	0.325
0.002	0.359	0.001	0.323	0.004	0.647	0.001	0.692	0.001				0.971	0.03	0.387	0.015	0.327
0.002	0.362	0.001	0.324	0.005	0.649	0.002	0.694	0.001				0.97	0.03	0.389	0.015	0.329
0.002	0.363	0.001	0.326	0.005	0.653	0.002	0.698	0.001				0.969	0.031	0.391	0.016	0.331
0.002	0.366	0.001	0.33	0.006	0.654	0.002	0.699	0.001				0.968	0.031	0.393	0.016	0.334
0.002	0.368	0.001	0.332	0.006	0.655	0.002	0.701	0.001				0.967	0.031	0.395	0.016	0.336
0.002	0.37	0.001	0.335	0.006	0.657	0.002	0.702	0.001				0.966	0.031	0.396	0.016	0.337
0.002	0.373	0.001	0.337	0.006	0.658	0.002	0.702	0.001				0.965	0.032	0.398	0.016	0.339
0.002	0.375	0.001	0.338	0.006	0.66	0.003	0.704	0.001				0.964	0.032	0.401	0.016	0.342
0.002	0.375	0.001	0.338	0.006	0.66	0.003	0.704	0.001				0.963	0.032	0.401	0.016	0.343
0.003	0.379	0.001	0.342	0.006	0.662	0.003	0.707	0.001				0.962	0.032	0.404	0.016	0.345
0.003	0.382	0.001	0.344	0.007	0.665	0.003	0.709	0.001				0.961	0.032	0.405	0.016	0.346
0.003	0.383	0.001	0.346	0.007	0.668	0.003	0.711	0.001				0.96	0.033	0.407	0.016	0.348
0.003	0.385	0.001	0.348	0.007	0.67	0.003	0.713	0.001				0.959	0.033	0.409	0.016	0.35
0.003	0.389	0.001	0.354	0.007	0.67	0.003	0.713	0.001				0.958	0.033	0.411	0.016	0.352
0.003	0.39	0.001	0.356	0.008	0.673	0.004	0.715	0.001				0.957	0.033	0.411	0.016	0.352
0.003	0.391	0.001	0.356	0.008	0.674	0.004	0.716	0.001				0.956	0.033	0.413	0.016	0.354
0.003	0.392	0.001	0.357	0.008	0.675	0.004	0.718	0.001				0.955	0.033	0.416	0.016	0.356
0.003	0.395	0.001	0.361	0.008	0.676	0.004	0.719	0.002				0.954	0.033	0.417	0.017	0.358
0.003	0.398	0.001	0.363	0.008	0.678	0.004	0.721	0.002				0.953	0.034	0.418	0.017	0.358
0.003	0.403	0.001	0.369	0.008	0.68	0.004	0.723	0.002				0.952	0.034	0.419	0.017	0.36
0.003	0.407	0.001	0.375	0.008	0.681	0.004	0.725	0.002				0.951	0.034	0.421	0.017	0.362
0.003	0.407	0.001	0.375	0.008	0.682	0.004	0.726	0.002				0.95	0.034	0.422	0.017	0.363
0.003	0.41	0.001	0.377	0.008	0.682	0.004	0.726	0.002				0.949	0.035	0.424	0.017	0.364
0.003	0.412	0.001	0.379	0.008	0.682	0.004	0.727	0.002				0.948	0.035	0.425	0.017	0.365
0.003	0.414	0.001	0.382	0.008	0.682	0.004	0.727	0.002				0.947	0.035	0.427	0.017	0.368
0.003	0.418	0.001	0.385	0.008	0.683	0.004	0.727	0.002				0.946	0.035	0.427	0.017	0.368
0.003	0.418	0.001	0.386	0.008	0.684	0.004	0.728	0.002				0.945	0.035	0.429	0.017	0.37
0.003	0.421	0.001	0.387	0.008	0.684	0.004	0.728	0.002				0.944	0.035	0.429	0.017	0.37
0.003	0.423	0.001	0.39	0.008	0.684	0.004	0.728	0.002				0.943	0.035	0.429	0.017	0.37
0.003	0.424	0.001	0.39	0.008	0.686	0.004	0.729	0.002				0.942	0.035	0.431	0.017	0.372
0.003	0.427	0.001	0.395	0.009	0.686	0.004	0.73	0.002				0.941	0.036	0.432	0.018	0.373
0.003	0.43	0.001	0.398	0.009	0.687	0.004	0.731	0.002				0.94	0.036	0.432	0.018	0.374
0.003	0.434	0.001	0.404	0.01	0.687	0.006	0.731	0.002				0.939	0.036	0.433	0.018	0.375
0.003	0.437	0.001	0.405	0.01	0.689	0.006	0.732	0.002				0.938	0.036	0.434	0.018	0.376
0.003	0.44	0.001	0.409	0.01	0.69	0.006	0.733	0.002				0.937	0.037	0.435	0.018	0.377
0.003	0.44	0.001	0.409	0.01	0.691	0.007	0.733	0.002				0.936	0.037	0.436	0.018	0.378
0.003	0.445	0.001	0.413	0.01	0.692	0.007	0.735	0.002				0.935	0.037	0.438	0.018	0.379
0.003	0.446	0.001	0.415	0.01	0.692	0.007	0.735	0.002				0.934	0.037	0.438	0.018	0.38
0.003	0.448	0.001	0.416	0.01	0.693	0.007	0.736	0.002				0.933	0.037	0.439	0.018	0.381
0.003	0.45	0.001	0.417	0.01	0.694	0.007	0.736	0.002				0.932	0.037	0.44	0.018	0.382
0.003	0.451	0.001	0.419	0.01	0.694	0.007	0.737	0.002				0.931	0.037	0.441	0.018	0.383
0.003	0.454	0.001	0.423	0.01	0.696	0.007	0.739	0.002				0.93	0.037	0.442	0.018	0.383
0.003	0.455	0.001	0.425	0.01	0.696	0.007	0.739	0.002				0.929	0.037	0.442	0.018	0.384
0.003	0.456	0.001	0.426	0.01	0.699	0.007	0.741	0.002				0.928	0.038	0.443	0.018	0.385
0.003	0.458	0.001	0.429	0.01	0.702	0.007	0.743	0.002				0.927	0.038	0.444	0.019	0.386
0.003	0.462	0.001	0.434	0.01	0.704	0.007	0.746	0.003				0.926	0.038	0.445	0.019	0.386
0.003	0.462	0.001	0.435	0.01	0.706	0.007	0.749	0.004				0.925	0.038	0.446	0.019	0.387
0.003	0.462	0.001	0.435	0.01	0.708	0.007	0.75	0.004				0.924	0.038	0.446	0.019	0.388
0.003	0.463	0.001	0.435	0.01	0.709	0.007	0.75	0.004				0.923	0.038	0.447	0.019	0.389
0.003	0.465	0.001	0.437	0.01	0.711	0.007	0.753	0.004				0.922	0.039	0.447	0.019	0.389
0.003	0.466	0.001	0.438	0.01	0.712	0.007	0.754	0.004				0.921	0.039	0.449	0.019	0.391
0.003	0.468	0.001	0.44	0.01	0.712	0.007	0.754	0.004				0.92	0.039	0.449	0.019	0.391
0.003	0.468	0.001	0.44	0.01	0.713	0.007	0.754	0.004				0.919	0.039	0.45	0.019	0.392
0.003	0.47	0.001	0.442	0.01	0.714	0.007	0.756	0.004				0.918	0.039	0.451	0.019	0.393
0.003	0.472	0.001	0.446	0.01	0.715	0.007	0.757	0.005				0.917	0.039	0.452	0.019	0.394
0.003	0.473	0.001	0.446	0.01	0.718	0.007	0.761	0.005				0.916	0.039	0.454	0.019	0.396
0.003	0.474	0.001	0.448	0.01	0.718	0.007	0.761	0.005				0.915	0.039	0.455	0.019	0.397
0.003	0.474	0.001	0.448	0.01	0.718	0.007	0.761	0.006				0.914	0.039	0.457	0.019	0.399
0.003	0.478	0.001	0.449	0.01	0.719	0.007	0.762	0.006				0.913	0.039	0.458	0.019	0.4
0.003	0.478	0.001	0.449	0.01	0.719	0.007	0.762	0.006				0.912	0.039	0.459	0.019	0.4
0.003	0.478	0.001	0.449	0.01	0.719	0.007	0.762	0.006				0.911	0.04	0.459	0.019	0.401
0.003	0.478	0.001	0.449	0.01	0.719	0.007	0.762	0.006				0.91	0.04	0.459	0.019	0.401
0.003	0.478	0.001	0.449	0.01	0.719	0.007	0.762	0.006				0.909	0.04	0.46	0.019	0.402
0.003	0.478	0.001	0.45	0.01	0.72	0.007	0.762	0.006				0.908	0.04	0.461	0.019	0.403
0.003	0.482	0.001	0.452	0.01	0.721	0.007	0.762	0.006				0.907	0.04	0.462	0.019	0.404
0.003	0.482	0.001	0.452	0.01	0.722	0.007	0.763	0.006				0.906	0.04	0.462	0.019	0.405
0.003	0.482	0.001	0.454	0.01	0.724	0.007	0.765	0.007				0.905	0.04	0.463	0.019	0.405
0.003	0.482	0.001	0.454	0.01	0.725	0.007	0.765	0.007				0.904	0.04	0.464	0.019	0.406
0.003	0.485	0.001	0.456	0.01	0.726	0.007	0.765	0.007				0.903	0.041	0.465	0.019	0.408
0.003	0.486	0.001	0.457	0.01	0.726	0.007	0.767	0.007				0.902	0.041	0.466	0.019	0.408
0.003	0.486	0.001	0.457	0.01	0.726	0.007	0.767	0.007				0.901	0.041	0.466	0.019	0.409
0.003	0.486	0.001	0.458	0.01	0.73	0.007	0.767	0.007				0.9	0.041	0.467	0.019	0.41
0.003	0.486	0.001	0.458	0.01	0.731	0.007	0.769	0.007				0.899	0.041	0.467	0.02	0.41
0.003	0.486	0.001	0.458	0.011	0.731	0.007	0.769	0.007				0.898	0.041	0.467	0.02	0.41
0.003	0.487	0.001	0.459	0.012	0.732	0.008	0.77	0.007				0.897	0.042	0.468	0.02	0.411
0.003	0.488	0.001	0.46	0.012	0.734	0.008	0.771	0.007				0.896	0.042	0.468	0.02	0.411
0.003	0.489	0.001	0.46	0.012	0.734	0.008	0.772	0.007				0.895	0.042	0.469	0.02	0.412
0.003	0.491	0.001	0.463	0.012	0.735	0.008	0.772	0.007				0.894	0.042	0.47	0.02	0.413
0.003	0.491	0.001	0.463	0.012	0.736	0.008	0.772	0.007				0.893	0.042	0.47	0.02	0.414
0.003	0.491	0.001	0.463	0.012	0.737	0.008	0.773	0.007				0.892	0.042	0.471	0.02	0.415
0.004	0.493	0.002	0.465	0.013	0.737	0.008	0.773	0.007				0.891	0.042	0.472	0.02	0.415
0.004	0.493	0.002	0.465	0.014	0.737	0.009	0.773	0.007				0.89	0.042	0.472	0.02	0.416
0.004	0.493	0.002	0.465	0.014	0.738	0.009	0.774	0.007				0.889	0.043	0.473	0.02	0.416
0.004	0.494	0.002	0.467	0.014	0.74	0.009	0.777	0.007				0.888	0.043	0.473	0.02	0.417
0.004	0.498	0.002	0.47	0.014	0.741	0.009	0.778	0.007				0.887	0.043	0.474	0.02	0.418
0.004	0.498	0.002	0.47	0.014	0.741	0.009	0.778	0.007				0.886	0.043	0.475	0.021	0.419
0.004	0.498	0.002	0.47	0.014	0.742	0.009	0.779	0.007				0.885	0.043	0.475	0.021	0.419
0.004	0.498	0.002	0.47	0.014	0.742	0.009	0.78	0.007				0.884	0.043	0.476	0.021	0.419
0.004	0.498	0.002	0.47	0.014	0.744	0.009	0.782	0.007				0.883	0.043	0.476	0.021	0.42
0.004	0.501	0.002	0.473	0.014	0.744	0.009	0.782	0.007				0.882	0.043	0.476	0.021	0.42
0.004	0.501	0.002	0.473	0.014	0.744	0.009	0.782	0.007				0.881	0.043	0.477	0.021	0.42
0.004	0.502	0.002	0.473	0.014	0.744	0.009	0.782	0.007				0.88	0.043	0.477	0.021	0.421
0.004	0.502	0.002	0.473	0.014	0.745	0.009	0.783	0.007				0.879	0.043	0.478	0.021	0.422
0.004	0.502	0.002	0.473	0.014	0.746	0.009	0.783	0.007				0.878	0.044	0.479	0.021	0.423
0.004	0.502	0.002	0.473	0.014	0.747	0.009	0.784	0.007				0.877	0.044	0.48	0.021	0.424
0.004	0.503	0.002	0.475	0.014	0.747	0.009	0.784	0.007				0.876	0.044	0.481	0.021	0.425
0.004	0.504	0.002	0.476	0.014	0.747	0.009	0.784	0.007				0.875	0.044	0.481	0.021	0.425
0.004	0.505	0.002	0.477	0.014	0.747	0.009	0.784	0.007				0.874	0.044	0.482	0.021	0.426
0.004	0.505	0.002	0.477	0.014	0.748	0.009	0.784	0.007				0.873	0.044	0.482	0.021	0.427
0.004	0.506	0.002	0.478	0.014	0.748	0.009	0.784	0.007				0.872	0.044	0.483	0.021	0.427
0.004	0.506	0.002	0.478	0.014	0.748	0.009	0.784	0.007				0.871	0.044	0.483	0.022	0.427
0.004	0.506	0.002	0.478	0.014	0.749	0.009	0.785	0.007				0.87	0.044	0.483	0.022	0.428
0.004	0.506	0.002	0.478	0.014	0.749	0.009	0.785	0.007				0.869	0.045	0.484	0.022	0.428
0.004	0.506	0.002	0.479	0.014	0.749	0.009	0.785	0.007				0.868	0.045	0.485	0.022	0.429
0.004	0.506	0.002	0.479	0.014	0.749	0.009	0.785	0.007				0.867	0.045	0.485	0.022	0.429
0.004	0.508	0.002	0.479	0.014	0.75	0.009	0.787	0.007				0.866	0.045	0.485	0.022	0.43
0.004	0.51	0.002	0.479	0.014	0.75	0.009	0.787	0.008				0.865	0.045	0.486	0.022	0.431
0.004	0.51	0.002	0.479	0.015	0.75	0.009	0.787	0.008				0.864	0.045	0.487	0.022	0.432
0.004	0.513	0.002	0.481	0.015	0.751	0.009	0.788	0.008				0.863	0.045	0.488	0.022	0.432
0.004	0.514	0.002	0.482	0.015	0.752	0.009	0.789	0.008				0.862	0.046	0.488	0.022	0.433
0.004	0.514	0.002	0.482	0.015	0.752	0.009	0.789	0.008				0.861	0.046	0.489	0.022	0.433
0.004	0.514	0.002	0.482	0.015	0.752	0.009	0.789	0.008				0.86	0.046	0.489	0.022	0.434
0.004	0.515	0.002	0.485	0.015	0.752	0.009	0.789	0.008				0.859	0.046	0.489	0.022	0.434
0.004	0.516	0.002	0.486	0.015	0.752	0.009	0.789	0.008				0.858	0.046	0.49	0.022	0.435
0.004	0.516	0.002	0.486	0.015	0.753	0.009	0.789	0.008				0.857	0.046	0.49	0.022	0.435
0.004	0.516	0.002	0.486	0.016	0.754	0.009	0.789	0.008				0.856	0.046	0.49	0.022	0.435
0.004	0.517	0.002	0.487	0.016	0.754	0.009	0.789	0.008				0.855	0.046	0.49	0.022	0.435
0.004	0.518	0.002	0.488	0.016	0.754	0.009	0.789	0.008				0.854	0.046	0.491	0.022	0.436
0.004	0.518	0.002	0.489	0.016	0.754	0.009	0.79	0.008				0.853	0.046	0.491	0.022	0.436
0.004	0.519	0.002	0.49	0.016	0.755	0.009	0.791	0.008				0.852	0.046	0.492	0.022	0.437
0.004	0.519	0.002	0.49	0.016	0.757	0.009	0.793	0.008				0.851	0.046	0.492	0.022	0.437
0.004	0.521	0.002	0.491	0.016	0.757	0.009	0.793	0.008				0.85	0.046	0.492	0.023	0.437
0.004	0.522	0.002	0.492	0.016	0.758	0.009	0.794	0.008				0.849	0.046	0.492	0.023	0.438
0.004	0.522	0.002	0.493	0.016	0.759	0.009	0.796	0.008				0.848	0.046	0.493	0.023	0.438
0.004	0.523	0.002	0.494	0.016	0.76	0.009	0.798	0.008				0.847	0.047	0.493	0.023	0.438
0.004	0.523	0.002	0.494	0.017	0.761	0.01	0.799	0.008				0.846	0.047	0.493	0.023	0.439
0.004	0.525	0.002	0.497	0.017	0.761	0.01	0.799	0.008				0.845	0.047	0.494	0.023	0.439
0.004	0.525	0.002	0.497	0.017	0.762	0.01	0.8	0.008				0.844	0.047	0.494	0.023	0.44
0.004	0.526	0.002	0.498	0.017	0.762	0.01	0.8	0.009				0.843	0.047	0.495	0.023	0.44
0.004	0.526	0.002	0.498	0.017	0.763	0.01	0.8	0.009				0.842	0.047	0.495	0.023	0.441
0.004	0.526	0.002	0.498	0.017	0.763	0.01	0.8	0.009				0.841	0.047	0.496	0.023	0.441
0.004	0.528	0.002	0.5	0.018	0.763	0.011	0.8	0.009				0.84	0.047	0.496	0.023	0.442
0.004	0.529	0.002	0.501	0.018	0.764	0.011	0.8	0.01				0.839	0.047	0.497	0.023	0.442
0.004	0.529	0.002	0.501	0.018	0.765	0.011	0.801	0.01				0.838	0.047	0.498	0.023	0.443
0.004	0.529	0.002	0.501	0.018	0.765	0.011	0.801	0.01				0.837	0.047	0.498	0.023	0.444
0.004	0.531	0.002	0.504	0.018	0.765	0.011	0.801	0.01				0.836	0.047	0.499	0.023	0.445
0.004	0.533	0.002	0.506	0.018	0.766	0.011	0.802	0.01				0.835	0.047	0.499	0.023	0.445
0.005	0.533	0.002	0.506	0.018	0.766	0.011	0.802	0.01				0.834	0.048	0.499	0.023	0.445
0.005	0.533	0.002	0.506	0.019	0.766	0.011	0.802	0.01				0.833	0.048	0.5	0.023	0.445
0.005	0.534	0.002	0.507	0.019	0.767	0.011	0.803	0.01				0.832	0.048	0.5	0.023	0.446
0.005	0.534	0.002	0.507	0.019	0.768	0.011	0.803	0.01				0.831	0.048	0.5	0.023	0.446
0.005	0.534	0.002	0.507	0.019	0.769	0.011	0.803	0.01				0.83	0.048	0.501	0.023	0.447
0.005	0.534	0.002	0.507	0.019	0.769	0.011	0.803	0.01				0.829	0.049	0.501	0.023	0.447
0.005	0.535	0.002	0.509	0.019	0.769	0.011	0.803	0.01				0.828	0.049	0.502	0.023	0.448
0.005	0.536	0.002	0.51	0.019	0.769	0.011	0.803	0.01				0.827	0.049	0.502	0.023	0.448
0.005	0.537	0.002	0.51	0.019	0.769	0.011	0.803	0.01				0.826	0.049	0.502	0.023	0.448
0.005	0.538	0.002	0.511	0.019	0.77	0.011	0.804	0.01				0.825	0.049	0.503	0.023	0.449
0.005	0.538	0.002	0.512	0.019	0.77	0.011	0.805	0.01				0.824	0.049	0.504	0.023	0.45
0.005	0.538	0.002	0.512	0.021	0.772	0.011	0.808	0.01				0.823	0.049	0.504	0.023	0.45
0.005	0.538	0.002	0.512	0.021	0.774	0.011	0.809	0.01				0.822	0.05	0.504	0.023	0.451
0.005	0.538	0.002	0.512	0.022	0.774	0.011	0.81	0.01				0.821	0.05	0.505	0.023	0.452
0.005	0.538	0.002	0.512	0.022	0.774	0.011	0.81	0.01				0.82	0.05	0.506	0.023	0.452
0.005	0.539	0.002	0.512	0.022	0.774	0.011	0.81	0.011				0.819	0.05	0.506	0.023	0.453
0.005	0.54	0.002	0.512	0.022	0.775	0.011	0.811	0.011				0.818	0.05	0.507	0.023	0.454
0.005	0.541	0.002	0.513	0.022	0.775	0.011	0.811	0.011				0.817	0.05	0.507	0.023	0.454
0.005	0.542	0.002	0.514	0.022	0.775	0.011	0.811	0.011				0.816	0.05	0.508	0.023	0.454
0.005	0.542	0.002	0.514	0.022	0.776	0.011	0.811	0.011				0.815	0.05	0.508	0.024	0.454
0.005	0.542	0.002	0.514	0.022	0.778	0.012	0.812	0.011				0.814	0.05	0.508	0.024	0.455
0.005	0.542	0.002	0.515	0.022	0.778	0.012	0.812	0.011				0.813	0.05	0.509	0.024	0.455
0.005	0.542	0.002	0.515	0.022	0.778	0.012	0.812	0.011				0.812	0.051	0.509	0.024	0.456
0.005	0.544	0.002	0.517	0.022	0.778	0.012	0.812	0.011				0.811	0.051	0.509	0.024	0.456
0.005	0.545	0.002	0.518	0.022	0.78	0.012	0.813	0.011				0.81	0.051	0.51	0.024	0.457
0.005	0.546	0.002	0.52	0.023	0.78	0.012	0.813	0.011				0.809	0.051	0.51	0.024	0.457
0.005	0.548	0.002	0.521	0.023	0.781	0.012	0.814	0.011				0.808	0.051	0.51	0.024	0.457
0.005	0.549	0.002	0.522	0.023	0.781	0.012	0.814	0.011				0.807	0.051	0.511	0.024	0.457
0.005	0.549	0.002	0.522	0.023	0.782	0.012	0.816	0.011				0.806	0.051	0.511	0.024	0.458
0.005	0.549	0.002	0.522	0.023	0.782	0.012	0.816	0.011				0.805	0.051	0.511	0.024	0.458
0.005	0.549	0.002	0.522	0.023	0.782	0.012	0.816	0.011				0.804	0.051	0.512	0.024	0.459
0.005	0.549	0.002	0.522	0.023	0.783	0.012	0.816	0.011				0.803	0.051	0.512	0.024	0.459
0.005	0.55	0.002	0.523	0.023	0.784	0.012	0.817	0.011				0.802	0.051	0.512	0.024	0.459
0.005	0.551	0.002	0.525	0.023	0.784	0.012	0.817	0.011				0.801	0.051	0.513	0.024	0.46
0.005	0.551	0.002	0.525	0.023	0.784	0.012	0.817	0.011				0.8	0.051	0.513	0.024	0.46
0.005	0.553	0.002	0.528	0.023	0.785	0.012	0.819	0.011				0.799	0.051	0.514	0.024	0.46
0.005	0.554	0.002	0.529	0.023	0.786	0.012	0.82	0.011				0.798	0.051	0.514	0.024	0.46
0.005	0.554	0.002	0.529	0.023	0.786	0.012	0.821	0.011				0.797	0.051	0.514	0.024	0.461
0.005	0.554	0.002	0.53	0.023	0.786	0.012	0.821	0.011				0.796	0.052	0.515	0.024	0.461
0.005	0.554	0.002	0.53	0.023	0.786	0.012	0.821	0.011				0.795	0.052	0.515	0.024	0.461
0.005	0.554	0.002	0.53	0.023	0.786	0.012	0.821	0.011				0.794	0.052	0.515	0.024	0.462
0.005	0.555	0.002	0.531	0.023	0.786	0.012	0.821	0.011				0.793	0.052	0.515	0.024	0.462
0.005	0.555	0.002	0.531	0.023	0.786	0.012	0.821	0.011				0.792	0.052	0.516	0.024	0.462
0.005	0.555	0.002	0.531	0.023	0.787	0.012	0.822	0.011				0.791	0.052	0.516	0.025	0.463
0.005	0.555	0.002	0.531	0.023	0.788	0.012	0.823	0.011				0.79	0.052	0.516	0.025	0.463
0.005	0.555	0.002	0.531	0.023	0.789	0.012	0.824	0.011				0.789	0.052	0.516	0.025	0.463
0.005	0.556	0.002	0.532	0.023	0.79	0.012	0.824	0.011				0.788	0.052	0.516	0.025	0.463
0.005	0.556	0.002	0.532	0.023	0.79	0.012	0.825	0.011				0.787	0.052	0.517	0.025	0.463
0.005	0.556	0.002	0.532	0.023	0.791	0.012	0.826	0.011				0.786	0.052	0.518	0.025	0.464
0.005	0.556	0.002	0.532	0.023	0.791	0.012	0.826	0.011				0.785	0.053	0.518	0.025	0.465
0.005	0.556	0.002	0.532	0.023	0.791	0.012	0.826	0.012				0.784	0.053	0.518	0.025	0.465
0.005	0.557	0.002	0.533	0.024	0.791	0.013	0.826	0.012				0.783	0.053	0.519	0.025	0.466
0.005	0.558	0.002	0.535	0.024	0.791	0.013	0.826	0.012				0.782	0.053	0.519	0.025	0.466
0.005	0.559	0.002	0.535	0.024	0.792	0.013	0.826	0.012				0.781	0.053	0.519	0.025	0.466
0.005	0.56	0.002	0.537	0.024	0.794	0.013	0.826	0.012				0.78	0.053	0.519	0.025	0.466
0.005	0.56	0.002	0.537	0.025	0.794	0.013	0.827	0.012				0.779	0.053	0.52	0.025	0.467
0.006	0.56	0.003	0.537	0.026	0.795	0.013	0.829	0.012				0.778	0.053	0.52	0.025	0.467
0.006	0.56	0.003	0.537	0.026	0.795	0.013	0.829	0.013				0.777	0.053	0.52	0.025	0.467
0.006	0.562	0.003	0.539	0.026	0.795	0.013	0.829	0.013				0.776	0.053	0.521	0.025	0.468
0.006	0.563	0.003	0.541	0.026	0.796	0.013	0.83	0.013				0.775	0.053	0.521	0.025	0.468
0.006	0.563	0.003	0.541	0.026	0.797	0.013	0.831	0.013				0.774	0.053	0.521	0.025	0.468
0.006	0.563	0.003	0.541	0.026	0.797	0.013	0.831	0.013				0.773	0.053	0.521	0.025	0.469
0.006	0.563	0.003	0.541	0.026	0.798	0.013	0.832	0.013				0.772	0.053	0.522	0.025	0.469
0.006	0.563	0.003	0.541	0.026	0.798	0.013	0.832	0.014				0.771	0.053	0.522	0.025	0.47
0.006	0.563	0.003	0.541	0.026	0.798	0.013	0.832	0.014				0.77	0.053	0.523	0.025	0.47
0.006	0.563	0.003	0.541	0.026	0.799	0.013	0.832	0.014				0.769	0.053	0.524	0.025	0.471
0.006	0.565	0.003	0.543	0.026	0.8	0.013	0.833	0.014				0.768	0.053	0.525	0.025	0.471
0.006	0.565	0.003	0.543	0.026	0.8	0.013	0.833	0.014				0.767	0.053	0.526	0.025	0.472
0.006	0.565	0.003	0.543	0.026	0.8	0.013	0.833	0.014				0.766	0.053	0.526	0.025	0.473
0.006	0.566	0.003	0.544	0.026	0.8	0.013	0.833	0.014				0.765	0.054	0.526	0.025	0.473
0.006	0.566	0.003	0.544	0.026	0.801	0.013	0.834	0.014				0.764	0.054	0.527	0.025	0.473
0.006	0.566	0.003	0.544	0.026	0.801	0.013	0.834	0.014				0.763	0.054	0.527	0.025	0.474
0.006	0.568	0.003	0.546	0.026	0.802	0.013	0.835	0.014				0.762	0.054	0.527	0.025	0.474
0.006	0.569	0.003	0.548	0.027	0.802	0.014	0.835	0.014				0.761	0.054	0.528	0.025	0.474
0.006	0.57	0.003	0.549	0.027	0.803	0.014	0.836	0.014				0.76	0.054	0.528	0.025	0.474
0.006	0.57	0.003	0.549	0.027	0.804	0.014	0.837	0.016				0.759	0.054	0.528	0.025	0.475
0.006	0.57	0.003	0.549	0.027	0.805	0.014	0.838	0.016				0.758	0.054	0.529	0.025	0.475
0.006	0.57	0.003	0.549	0.027	0.806	0.014	0.84	0.017				0.757	0.054	0.529	0.025	0.475
0.006	0.57	0.003	0.549	0.028	0.806	0.014	0.841	0.017				0.756	0.054	0.529	0.025	0.476
0.006	0.57	0.003	0.549	0.028	0.807	0.014	0.842	0.017				0.755	0.054	0.53	0.025	0.476
0.006	0.57	0.003	0.549	0.028	0.807	0.014	0.842	0.017				0.754	0.054	0.53	0.025	0.476
0.006	0.571	0.003	0.55	0.028	0.807	0.014	0.842	0.017				0.753	0.054	0.53	0.025	0.477
0.006	0.572	0.003	0.551	0.028	0.807	0.014	0.842	0.017				0.752	0.054	0.531	0.025	0.477
0.006	0.572	0.003	0.551	0.028	0.807	0.014	0.842	0.017				0.751	0.054	0.531	0.025	0.477
0.006	0.572	0.003	0.551	0.029	0.807	0.014	0.842	0.018				0.75	0.054	0.532	0.025	0.478
0.006	0.572	0.003	0.551	0.029	0.809	0.014	0.842	0.018				0.749	0.054	0.532	0.025	0.478
0.006	0.572	0.003	0.551	0.029	0.809	0.014	0.842	0.018				0.748	0.054	0.532	0.025	0.478
0.006	0.572	0.003	0.551	0.029	0.809	0.014	0.842	0.018				0.747	0.054	0.532	0.025	0.478
0.006	0.574	0.003	0.553	0.03	0.809	0.014	0.842	0.018				0.746	0.054	0.533	0.025	0.479
0.006	0.575	0.003	0.554	0.03	0.81	0.014	0.842	0.018				0.745	0.054	0.533	0.025	0.479
0.006	0.575	0.003	0.554	0.03	0.81	0.014	0.842	0.018				0.744	0.054	0.534	0.025	0.48
0.006	0.575	0.003	0.554	0.03	0.81	0.014	0.842	0.018				0.743	0.055	0.534	0.026	0.48
0.006	0.576	0.003	0.555	0.03	0.81	0.014	0.842	0.018				0.742	0.055	0.534	0.026	0.48
0.006	0.576	0.003	0.555	0.03	0.81	0.014	0.842	0.018				0.741	0.055	0.534	0.026	0.48
0.006	0.576	0.003	0.555	0.03	0.81	0.014	0.842	0.018				0.74	0.055	0.535	0.026	0.481
0.006	0.576	0.003	0.555	0.03	0.81	0.014	0.842	0.018				0.739	0.055	0.535	0.026	0.481
0.006	0.576	0.003	0.555	0.03	0.81	0.014	0.842	0.018				0.738	0.055	0.536	0.026	0.482
0.006	0.577	0.003	0.556	0.03	0.811	0.014	0.843	0.018				0.737	0.055	0.536	0.026	0.482
0.006	0.578	0.003	0.558	0.03	0.813	0.014	0.843	0.018				0.736	0.055	0.537	0.026	0.483
0.006	0.578	0.003	0.559	0.03	0.813	0.014	0.843	0.018				0.735	0.055	0.537	0.026	0.483
0.006	0.579	0.003	0.56	0.03	0.813	0.014	0.843	0.018				0.734	0.055	0.537	0.026	0.484
0.006	0.579	0.003	0.56	0.03	0.814	0.014	0.844	0.018				0.733	0.056	0.538	0.026	0.484
0.006	0.58	0.003	0.56	0.03	0.815	0.014	0.845	0.018				0.732	0.056	0.538	0.026	0.485
0.006	0.58	0.003	0.56	0.03	0.815	0.014	0.845	0.018				0.731	0.056	0.539	0.026	0.485
0.006	0.58	0.003	0.56	0.03	0.815	0.014	0.845	0.018				0.73	0.056	0.539	0.026	0.485
0.006	0.58	0.003	0.56	0.03	0.815	0.014	0.845	0.018				0.729	0.056	0.539	0.026	0.486
0.006	0.581	0.003	0.56	0.03	0.815	0.014	0.845	0.018				0.728	0.056	0.54	0.026	0.486
0.006	0.581	0.003	0.56	0.03	0.815	0.015	0.845	0.019				0.727	0.056	0.54	0.026	0.487
0.006	0.582	0.003	0.561	0.03	0.816	0.015	0.845	0.019				0.726	0.056	0.54	0.026	0.487
0.006	0.582	0.003	0.561	0.031	0.817	0.017	0.845	0.019				0.725	0.056	0.541	0.026	0.488
0.006	0.582	0.003	0.561	0.031	0.817	0.017	0.845	0.019				0.724	0.056	0.541	0.026	0.488
0.006	0.582	0.003	0.561	0.031	0.818	0.017	0.846	0.019				0.723	0.056	0.542	0.026	0.489
0.006	0.582	0.003	0.561	0.031	0.818	0.017	0.846	0.019				0.722	0.056	0.542	0.026	0.489
0.006	0.582	0.003	0.562	0.031	0.818	0.017	0.847	0.019				0.721	0.057	0.542	0.027	0.489
0.006	0.582	0.003	0.562	0.032	0.818	0.018	0.847	0.019				0.72	0.057	0.543	0.027	0.49
0.006	0.584	0.003	0.564	0.032	0.818	0.018	0.847	0.019				0.719	0.057	0.543	0.027	0.49
0.006	0.584	0.003	0.564	0.032	0.819	0.018	0.847	0.02				0.718	0.057	0.543	0.027	0.49
0.006	0.584	0.003	0.564	0.032	0.819	0.018	0.847	0.02				0.717	0.057	0.543	0.027	0.49
0.006	0.584	0.003	0.564	0.032	0.819	0.018	0.847	0.02				0.716	0.057	0.544	0.027	0.491
0.006	0.584	0.003	0.564	0.032	0.819	0.018	0.847	0.02				0.715	0.057	0.544	0.027	0.491
0.006	0.584	0.003	0.564	0.032	0.82	0.018	0.848	0.02				0.714	0.057	0.544	0.027	0.491
0.006	0.584	0.003	0.564	0.032	0.82	0.018	0.848	0.02				0.713	0.057	0.544	0.027	0.491
0.006	0.584	0.003	0.564	0.032	0.82	0.018	0.848	0.02				0.712	0.057	0.545	0.027	0.492
0.006	0.585	0.003	0.565	0.032	0.82	0.018	0.848	0.02				0.711	0.057	0.545	0.027	0.492
0.006	0.585	0.003	0.565	0.032	0.82	0.018	0.848	0.02				0.71	0.057	0.545	0.027	0.492
0.006	0.586	0.003	0.566	0.032	0.82	0.018	0.848	0.02				0.709	0.057	0.545	0.027	0.492
0.006	0.586	0.003	0.567	0.033	0.82	0.019	0.848	0.02				0.708	0.057	0.545	0.027	0.492
0.006	0.586	0.003	0.567	0.033	0.82	0.019	0.848	0.02				0.707	0.057	0.546	0.027	0.493
0.006	0.586	0.003	0.567	0.033	0.82	0.019	0.848	0.02				0.706	0.057	0.546	0.027	0.493
0.006	0.586	0.003	0.567	0.034	0.821	0.019	0.85	0.021				0.705	0.057	0.546	0.027	0.493
0.006	0.588	0.003	0.57	0.034	0.822	0.019	0.851	0.021				0.704	0.057	0.547	0.027	0.494
0.006	0.589	0.003	0.571	0.034	0.822	0.019	0.852	0.022				0.703	0.057	0.547	0.027	0.494
0.006	0.589	0.003	0.571	0.034	0.822	0.019	0.852	0.022				0.702	0.057	0.547	0.027	0.494
0.006	0.59	0.003	0.573	0.034	0.822	0.019	0.852	0.022				0.701	0.057	0.548	0.027	0.495
0.006	0.59	0.003	0.573	0.035	0.822	0.02	0.852	0.022				0.7	0.057	0.548	0.027	0.495
0.006	0.59	0.003	0.573	0.035	0.822	0.02	0.852	0.022				0.699	0.057	0.548	0.027	0.495
0.006	0.59	0.003	0.573	0.035	0.822	0.02	0.852	0.022				0.698	0.057	0.548	0.027	0.496
0.006	0.59	0.003	0.573	0.035	0.822	0.02	0.852	0.022				0.697	0.057	0.549	0.027	0.496
0.006	0.59	0.003	0.573	0.035	0.823	0.02	0.853	0.022				0.696	0.057	0.549	0.027	0.496
0.006	0.591	0.003	0.574	0.035	0.823	0.02	0.853	0.022				0.695	0.057	0.553	0.027	0.496
0.006	0.591	0.003	0.574	0.035	0.825	0.02	0.855	0.022				0.694	0.058	0.553	0.027	0.496
0.006	0.591	0.003	0.574	0.036	0.826	0.021	0.856	0.022				0.693	0.058	0.554	0.027	0.497
0.006	0.591	0.003	0.574	0.036	0.826	0.021	0.856	0.023				0.692	0.058	0.554	0.027	0.497
0.006	0.591	0.003	0.574	0.036	0.826	0.021	0.857	0.023				0.691	0.058	0.555	0.027	0.498
0.006	0.591	0.003	0.574	0.036	0.826	0.021	0.857	0.024				0.69	0.058	0.555	0.027	0.498
0.006	0.591	0.003	0.574	0.036	0.826	0.021	0.857	0.024				0.689	0.058	0.555	0.027	0.498
0.006	0.592	0.003	0.575	0.036	0.826	0.021	0.857	0.025				0.688	0.058	0.555	0.028	0.498
0.006	0.593	0.003	0.576	0.036	0.827	0.021	0.857	0.025				0.687	0.058	0.556	0.028	0.499
0.006	0.594	0.003	0.577	0.036	0.827	0.021	0.857	0.026				0.686	0.059	0.556	0.028	0.499
0.006	0.594	0.003	0.577	0.037	0.828	0.022	0.858	0.026				0.685	0.059	0.557	0.028	0.5
0.006	0.594	0.003	0.577	0.037	0.829	0.022	0.858	0.026				0.684	0.059	0.557	0.028	0.501
0.006	0.594	0.003	0.577	0.038	0.829	0.023	0.858	0.026				0.683	0.059	0.558	0.028	0.501
0.006	0.595	0.003	0.577	0.038	0.83	0.023	0.86	0.026				0.682	0.059	0.558	0.028	0.501
0.006	0.595	0.003	0.577	0.038	0.83	0.023	0.86	0.026				0.681	0.059	0.558	0.028	0.501
0.006	0.595	0.003	0.577	0.038	0.83	0.023	0.861	0.026				0.68	0.059	0.558	0.028	0.502
0.006	0.595	0.003	0.577	0.038	0.83	0.023	0.861	0.026				0.679	0.059	0.558	0.028	0.502
0.006	0.595	0.003	0.577	0.038	0.83	0.023	0.861	0.026				0.678	0.059	0.558	0.028	0.502
0.006	0.595	0.003	0.577	0.038	0.831	0.023	0.862	0.026				0.677	0.059	0.558	0.028	0.502
0.006	0.596	0.003	0.579	0.038	0.831	0.023	0.862	0.026				0.676	0.059	0.558	0.028	0.502
0.006	0.596	0.003	0.579	0.038	0.831	0.023	0.862	0.026				0.675	0.059	0.559	0.028	0.503
0.006	0.596	0.003	0.579	0.038	0.831	0.023	0.862	0.026				0.674	0.059	0.559	0.028	0.503
0.006	0.596	0.003	0.579	0.038	0.831	0.023	0.862	0.026				0.673	0.059	0.56	0.028	0.503
0.006	0.596	0.003	0.579	0.038	0.832	0.023	0.863	0.026				0.672	0.059	0.56	0.028	0.503
0.006	0.596	0.003	0.579	0.038	0.832	0.023	0.863	0.026				0.671	0.06	0.561	0.028	0.504
0.006	0.596	0.003	0.579	0.038	0.833	0.023	0.863	0.026				0.67	0.06	0.561	0.028	0.504
0.006	0.596	0.003	0.579	0.038	0.834	0.023	0.864	0.026				0.669	0.06	0.561	0.028	0.504
0.006	0.596	0.003	0.579	0.038	0.834	0.023	0.864	0.026				0.668	0.06	0.561	0.028	0.504
0.006	0.596	0.003	0.579	0.038	0.834	0.023	0.864	0.027				0.667	0.06	0.562	0.028	0.505
0.006	0.597	0.003	0.58	0.038	0.834	0.023	0.864	0.027				0.666	0.06	0.562	0.028	0.505
0.006	0.597	0.003	0.58	0.038	0.834	0.023	0.865	0.027				0.665	0.06	0.562	0.028	0.505
0.006	0.597	0.003	0.58	0.038	0.834	0.023	0.865	0.027				0.664	0.06	0.562	0.028	0.505
0.006	0.597	0.003	0.58	0.038	0.835	0.023	0.866	0.027				0.663	0.06	0.562	0.028	0.505
0.006	0.598	0.003	0.581	0.038	0.836	0.023	0.867	0.029				0.662	0.06	0.563	0.028	0.506
0.006	0.598	0.003	0.582	0.038	0.838	0.023	0.869	0.029				0.661	0.06	0.563	0.028	0.506
0.006	0.6	0.003	0.584	0.038	0.838	0.023	0.869	0.029				0.66	0.06	0.563	0.028	0.506
0.006	0.6	0.003	0.584	0.039	0.838	0.024	0.869	0.03				0.659	0.061	0.563	0.028	0.506
0.006	0.6	0.003	0.584	0.04	0.838	0.024	0.869	0.03				0.658	0.061	0.563	0.028	0.506
0.006	0.6	0.003	0.584	0.04	0.839	0.024	0.871	0.03				0.657	0.061	0.564	0.028	0.507
0.006	0.6	0.003	0.584	0.04	0.839	0.024	0.871	0.03				0.656	0.061	0.564	0.028	0.507
0.006	0.6	0.003	0.584	0.04	0.84	0.024	0.872	0.03				0.655	0.061	0.564	0.028	0.507
0.006	0.6	0.003	0.584	0.041	0.84	0.025	0.872	0.03				0.654	0.061	0.564	0.028	0.507
0.006	0.601	0.003	0.585	0.041	0.84	0.025	0.872	0.03				0.653	0.061	0.565	0.028	0.508
0.006	0.602	0.003	0.586	0.041	0.841	0.025	0.873	0.031				0.652	0.061	0.565	0.028	0.508
0.006	0.602	0.003	0.586	0.041	0.841	0.025	0.873	0.031				0.651	0.061	0.565	0.028	0.508
0.006	0.602	0.003	0.587	0.041	0.841	0.025	0.873	0.031				0.65	0.061	0.565	0.028	0.508
0.006	0.602	0.003	0.587	0.041	0.841	0.025	0.873	0.031				0.649	0.061	0.565	0.029	0.508
0.006	0.602	0.003	0.587	0.041	0.842	0.025	0.873	0.031				0.648	0.061	0.566	0.029	0.509
0.006	0.602	0.003	0.587	0.041	0.842	0.025	0.873	0.031				0.647	0.061	0.566	0.029	0.509
0.006	0.603	0.003	0.588	0.042	0.843	0.027	0.874	0.031				0.646	0.062	0.567	0.029	0.51
0.006	0.605	0.003	0.591	0.042	0.843	0.027	0.874	0.031				0.645	0.062	0.567	0.029	0.51
0.006	0.605	0.003	0.591	0.042	0.844	0.027	0.874	0.031				0.644	0.062	0.568	0.029	0.511
0.006	0.605	0.003	0.591	0.042	0.844	0.027	0.874	0.031				0.643	0.062	0.568	0.029	0.511
0.006	0.605	0.003	0.591	0.042	0.844	0.027	0.874	0.031				0.642	0.062	0.568	0.029	0.511
0.006	0.606	0.003	0.592	0.043	0.845	0.029	0.875	0.031				0.641	0.062	0.569	0.029	0.512
0.006	0.606	0.003	0.592	0.043	0.846	0.029	0.876	0.031				0.64	0.063	0.569	0.029	0.512
0.006	0.606	0.003	0.593	0.043	0.846	0.029	0.877	0.033				0.639	0.063	0.569	0.029	0.512
0.006	0.606	0.003	0.593	0.043	0.847	0.029	0.877	0.033				0.638	0.063	0.569	0.029	0.512
0.006	0.606	0.003	0.593	0.043	0.847	0.029	0.877	0.033				0.637	0.063	0.569	0.029	0.513
0.006	0.606	0.003	0.593	0.043	0.847	0.029	0.877	0.033				0.636	0.063	0.569	0.029	0.513
0.006	0.606	0.003	0.593	0.043	0.848	0.029	0.878	0.033				0.635	0.063	0.569	0.029	0.513
0.006	0.607	0.003	0.594	0.043	0.849	0.029	0.879	0.034				0.634	0.063	0.57	0.029	0.513
0.006	0.607	0.003	0.594	0.043	0.849	0.029	0.879	0.034				0.633	0.063	0.57	0.029	0.514
0.006	0.608	0.003	0.594	0.043	0.849	0.029	0.879	0.034				0.632	0.063	0.571	0.029	0.514
0.006	0.608	0.003	0.594	0.043	0.849	0.029	0.879	0.034				0.631	0.063	0.572	0.029	0.516
0.006	0.608	0.003	0.594	0.043	0.849	0.029	0.879	0.034				0.63	0.063	0.573	0.029	0.516
0.006	0.61	0.003	0.597	0.043	0.85	0.029	0.879	0.035				0.629	0.063	0.573	0.029	0.517
0.006	0.61	0.003	0.597	0.044	0.851	0.029	0.879	0.035				0.628	0.063	0.573	0.03	0.517
0.006	0.61	0.003	0.597	0.045	0.851	0.03	0.879	0.035				0.627	0.063	0.573	0.03	0.517
0.006	0.612	0.003	0.6	0.045	0.852	0.03	0.879	0.035				0.626	0.063	0.573	0.03	0.517
0.006	0.612	0.003	0.6	0.045	0.852	0.03	0.879	0.036				0.625	0.063	0.573	0.03	0.517
0.006	0.613	0.003	0.601	0.045	0.852	0.03	0.879	0.036				0.624	0.063	0.574	0.03	0.518
0.006	0.613	0.003	0.601	0.045	0.852	0.03	0.879	0.036				0.623	0.064	0.574	0.03	0.518
0.006	0.614	0.003	0.602	0.045	0.854	0.03	0.879	0.037				0.622	0.064	0.574	0.03	0.518
0.006	0.614	0.003	0.602	0.046	0.854	0.03	0.879	0.037				0.621	0.064	0.574	0.03	0.518
0.006	0.614	0.003	0.602	0.046	0.854	0.03	0.879	0.037				0.62	0.064	0.574	0.03	0.518
0.006	0.614	0.003	0.602	0.046	0.854	0.031	0.879	0.037				0.619	0.064	0.575	0.03	0.519
0.006	0.614	0.003	0.602	0.046	0.854	0.031	0.879	0.038				0.618	0.064	0.575	0.03	0.519
0.006	0.614	0.003	0.602	0.046	0.854	0.031	0.879	0.038				0.617	0.064	0.575	0.03	0.519
0.006	0.614	0.003	0.602	0.046	0.854	0.031	0.879	0.038				0.616	0.064	0.575	0.03	0.52
0.006	0.614	0.003	0.602	0.046	0.854	0.031	0.879	0.038				0.615	0.064	0.576	0.03	0.52
0.006	0.614	0.003	0.603	0.046	0.854	0.031	0.879	0.038				0.614	0.064	0.576	0.03	0.52
0.006	0.614	0.003	0.603	0.046	0.854	0.031	0.879	0.038				0.613	0.064	0.576	0.03	0.52
0.006	0.614	0.003	0.603	0.047	0.854	0.032	0.879	0.039				0.612	0.064	0.576	0.03	0.52
0.006	0.615	0.003	0.604	0.047	0.854	0.032	0.879	0.039				0.611	0.064	0.577	0.03	0.521
0.006	0.616	0.003	0.605	0.047	0.854	0.032	0.879	0.04				0.61	0.064	0.577	0.03	0.521
0.006	0.616	0.003	0.605	0.047	0.855	0.032	0.881	0.04				0.609	0.064	0.577	0.03	0.522
0.006	0.616	0.003	0.605	0.047	0.855	0.032	0.881	0.04				0.608	0.064	0.577	0.03	0.522
0.006	0.616	0.003	0.605	0.047	0.855	0.032	0.881	0.04				0.607	0.064	0.578	0.03	0.522
0.006	0.616	0.003	0.605	0.047	0.855	0.032	0.881	0.04				0.606	0.064	0.578	0.03	0.522
0.006	0.617	0.003	0.605	0.047	0.855	0.032	0.881	0.04				0.605	0.064	0.578	0.03	0.523
0.006	0.617	0.003	0.605	0.047	0.855	0.032	0.881	0.04				0.604	0.064	0.578	0.03	0.523
0.006	0.617	0.003	0.605	0.047	0.855	0.032	0.881	0.041				0.603	0.064	0.579	0.03	0.523
0.006	0.617	0.003	0.605	0.047	0.855	0.032	0.881	0.041				0.602	0.065	0.579	0.03	0.523
0.006	0.618	0.003	0.605	0.047	0.856	0.032	0.881	0.041				0.601	0.065	0.579	0.03	0.524
0.006	0.619	0.003	0.607	0.047	0.856	0.032	0.881	0.041				0.6	0.065	0.579	0.03	0.524
0.006	0.619	0.003	0.607	0.047	0.857	0.032	0.881	0.041				0.599	0.065	0.579	0.031	0.524
0.006	0.619	0.003	0.607	0.047	0.857	0.032	0.881	0.041				0.598	0.065	0.579	0.031	0.524
0.006	0.621	0.003	0.61	0.047	0.857	0.032	0.881	0.041				0.597	0.065	0.579	0.031	0.524
0.006	0.621	0.003	0.61	0.047	0.857	0.032	0.881	0.042				0.596	0.065	0.58	0.031	0.524
0.006	0.621	0.003	0.61	0.047	0.858	0.032	0.882	0.042				0.595	0.065	0.58	0.031	0.524
0.006	0.622	0.003	0.611	0.047	0.858	0.032	0.882	0.042				0.594	0.065	0.58	0.031	0.525
0.006	0.623	0.003	0.613	0.048	0.858	0.032	0.883	0.042				0.593	0.065	0.581	0.031	0.525
0.006	0.623	0.003	0.613	0.048	0.858	0.032	0.883	0.043				0.592	0.065	0.581	0.031	0.525
0.006	0.623	0.003	0.613	0.048	0.858	0.032	0.883	0.043				0.591	0.066	0.581	0.031	0.525
0.006	0.623	0.003	0.613	0.048	0.858	0.032	0.883	0.043				0.59	0.066	0.582	0.031	0.527
0.006	0.624	0.003	0.614	0.048	0.858	0.032	0.883	0.043				0.589	0.066	0.582	0.031	0.527
0.006	0.626	0.003	0.616	0.048	0.859	0.032	0.883	0.045				0.588	0.066	0.583	0.031	0.527
0.006	0.626	0.003	0.616	0.048	0.859	0.032	0.883	0.045				0.587	0.066	0.583	0.031	0.527
0.006	0.626	0.003	0.617	0.048	0.86	0.032	0.883	0.045				0.586	0.066	0.583	0.031	0.528
0.006	0.627	0.003	0.618	0.049	0.861	0.033	0.884	0.045				0.585	0.066	0.584	0.031	0.528
0.006	0.627	0.003	0.618	0.05	0.862	0.033	0.884	0.045				0.584	0.066	0.584	0.031	0.529
0.006	0.627	0.003	0.618	0.05	0.862	0.033	0.884	0.045				0.583	0.066	0.584	0.031	0.529
0.006	0.627	0.003	0.618	0.05	0.862	0.033	0.885	0.045				0.582	0.066	0.584	0.031	0.53
0.006	0.628	0.003	0.619	0.05	0.863	0.033	0.885	0.045				0.581	0.066	0.585	0.031	0.53
0.006	0.628	0.003	0.619	0.051	0.864	0.034	0.886	0.046				0.58	0.066	0.585	0.031	0.53
0.006	0.628	0.003	0.619	0.051	0.864	0.034	0.886	0.046				0.579	0.067	0.586	0.031	0.53
0.006	0.628	0.003	0.619	0.051	0.864	0.034	0.886	0.046				0.578	0.067	0.586	0.031	0.53
0.006	0.628	0.003	0.619	0.051	0.864	0.034	0.886	0.046				0.577	0.067	0.586	0.031	0.531
0.006	0.628	0.003	0.619	0.052	0.864	0.034	0.886	0.046				0.576	0.067	0.587	0.032	0.531
0.006	0.628	0.003	0.619	0.052	0.864	0.034	0.886	0.046				0.575	0.067	0.587	0.032	0.531
0.006	0.628	0.003	0.619	0.052	0.864	0.034	0.886	0.046				0.574	0.067	0.587	0.032	0.531
0.007	0.628	0.004	0.619	0.052	0.864	0.034	0.886	0.046				0.573	0.067	0.587	0.032	0.531
0.007	0.628	0.004	0.619	0.052	0.864	0.034	0.886	0.046				0.572	0.067	0.587	0.032	0.531
0.007	0.628	0.004	0.619	0.052	0.864	0.034	0.886	0.046				0.571	0.067	0.587	0.032	0.532
0.007	0.628	0.004	0.619	0.052	0.865	0.034	0.887	0.046				0.57	0.067	0.587	0.032	0.532
0.007	0.628	0.004	0.619	0.052	0.865	0.034	0.887	0.046				0.569	0.067	0.588	0.032	0.532
0.007	0.628	0.004	0.619	0.052	0.865	0.034	0.887	0.046				0.568	0.067	0.588	0.032	0.532
0.007	0.628	0.004	0.619	0.052	0.865	0.034	0.887	0.046				0.567	0.067	0.588	0.032	0.533
0.007	0.628	0.004	0.619	0.052	0.865	0.034	0.887	0.046				0.566	0.067	0.588	0.032	0.533
0.007	0.628	0.004	0.619	0.052	0.865	0.034	0.887	0.046				0.565	0.067	0.589	0.032	0.533
0.007	0.629	0.004	0.621	0.052	0.866	0.034	0.888	0.046				0.564	0.067	0.589	0.032	0.534
0.007	0.629	0.004	0.621	0.052	0.866	0.034	0.888	0.046				0.563	0.067	0.589	0.032	0.534
0.007	0.63	0.004	0.622	0.052	0.866	0.034	0.888	0.046				0.562	0.067	0.589	0.032	0.534
0.007	0.63	0.004	0.622	0.052	0.866	0.034	0.888	0.046				0.561	0.067	0.589	0.032	0.534
0.007	0.63	0.004	0.622	0.052	0.866	0.034	0.888	0.046				0.56	0.068	0.59	0.032	0.535
0.007	0.63	0.004	0.622	0.052	0.866	0.034	0.888	0.046				0.559	0.068	0.591	0.032	0.535
0.007	0.63	0.004	0.622	0.052	0.866	0.034	0.888	0.046				0.558	0.068	0.591	0.032	0.536
0.007	0.63	0.004	0.622	0.052	0.866	0.034	0.888	0.046				0.557	0.068	0.591	0.032	0.536
0.007	0.632	0.004	0.624	0.052	0.866	0.034	0.888	0.047				0.556	0.068	0.591	0.032	0.536
0.007	0.633	0.004	0.625	0.052	0.866	0.034	0.888	0.047				0.555	0.068	0.592	0.032	0.536
0.008	0.633	0.004	0.625	0.052	0.866	0.034	0.888	0.048				0.554	0.068	0.592	0.032	0.536
0.008	0.634	0.004	0.627	0.053	0.867	0.035	0.888	0.048				0.553	0.068	0.592	0.032	0.537
0.008	0.635	0.004	0.627	0.053	0.869	0.035	0.888	0.048				0.552	0.068	0.592	0.032	0.537
0.008	0.636	0.004	0.628	0.053	0.87	0.035	0.889	0.048				0.551	0.068	0.593	0.032	0.537
0.008	0.636	0.004	0.628	0.053	0.87	0.035	0.889	0.048				0.55	0.068	0.593	0.032	0.538
0.008	0.636	0.004	0.628	0.053	0.87	0.035	0.889	0.048				0.549	0.068	0.594	0.032	0.538
0.008	0.636	0.004	0.628	0.054	0.87	0.037	0.889	0.048				0.548	0.068	0.594	0.032	0.538
0.008	0.637	0.004	0.628	0.054	0.87	0.037	0.889	0.048				0.547	0.068	0.594	0.032	0.538
0.008	0.637	0.004	0.628	0.054	0.87	0.037	0.889	0.049				0.546	0.068	0.594	0.032	0.539
0.008	0.637	0.004	0.628	0.054	0.87	0.037	0.889	0.05				0.545	0.068	0.594	0.032	0.539
0.008	0.637	0.004	0.628	0.055	0.87	0.037	0.889	0.05				0.544	0.068	0.594	0.032	0.539
0.008	0.637	0.004	0.628	0.055	0.87	0.037	0.889	0.05				0.543	0.068	0.594	0.032	0.539
0.009	0.637	0.006	0.628	0.055	0.87	0.037	0.889	0.05				0.542	0.069	0.594	0.032	0.539
0.009	0.638	0.006	0.629	0.055	0.87	0.037	0.889	0.05				0.541	0.069	0.595	0.032	0.54
0.009	0.638	0.006	0.629	0.055	0.871	0.037	0.889	0.051				0.54	0.069	0.595	0.032	0.54
0.009	0.639	0.006	0.632	0.055	0.871	0.037	0.889	0.051				0.539	0.069	0.595	0.032	0.54
0.009	0.639	0.006	0.632	0.056	0.872	0.037	0.889	0.051				0.538	0.069	0.596	0.032	0.54
0.009	0.64	0.006	0.632	0.056	0.872	0.037	0.889	0.051				0.537	0.07	0.596	0.032	0.541
0.009	0.64	0.006	0.632	0.056	0.872	0.037	0.889	0.051				0.536	0.07	0.596	0.032	0.541
0.009	0.64	0.006	0.632	0.057	0.872	0.037	0.889	0.051				0.535	0.07	0.596	0.032	0.541
0.009	0.64	0.006	0.632	0.058	0.873	0.037	0.89	0.053				0.534	0.07	0.596	0.032	0.541
0.009	0.64	0.006	0.632	0.058	0.874	0.037	0.892	0.054				0.533	0.07	0.597	0.032	0.542
0.009	0.64	0.006	0.632	0.058	0.874	0.037	0.892	0.054				0.532	0.07	0.597	0.032	0.542
0.009	0.64	0.006	0.632	0.058	0.874	0.037	0.893	0.054				0.531	0.07	0.597	0.032	0.543
0.009	0.641	0.006	0.633	0.058	0.875	0.037	0.894	0.054				0.53	0.07	0.598	0.032	0.543
0.009	0.641	0.006	0.633	0.058	0.875	0.037	0.894	0.054				0.529	0.07	0.598	0.032	0.543
0.009	0.642	0.006	0.634	0.058	0.876	0.037	0.895	0.054				0.528	0.07	0.598	0.032	0.543
0.009	0.642	0.006	0.634	0.058	0.876	0.037	0.895	0.054				0.527	0.07	0.598	0.032	0.543
0.009	0.642	0.006	0.634	0.058	0.876	0.037	0.895	0.055				0.526	0.07	0.599	0.032	0.544
0.009	0.642	0.006	0.635	0.058	0.877	0.037	0.896	0.056				0.525	0.07	0.599	0.032	0.544
0.009	0.642	0.006	0.635	0.058	0.878	0.037	0.897	0.056				0.524	0.07	0.599	0.032	0.545
0.009	0.643	0.006	0.635	0.058	0.878	0.037	0.897	0.058				0.523	0.07	0.599	0.032	0.545
0.009	0.644	0.006	0.636	0.058	0.878	0.037	0.897	0.059				0.522	0.071	0.6	0.032	0.545
0.009	0.644	0.006	0.636	0.058	0.878	0.037	0.897	0.059				0.521	0.071	0.6	0.032	0.545
0.009	0.644	0.006	0.636	0.058	0.878	0.037	0.897	0.06				0.52	0.071	0.601	0.032	0.546
0.009	0.644	0.006	0.636	0.06	0.878	0.037	0.897	0.06				0.519	0.071	0.601	0.032	0.546
0.009	0.645	0.006	0.637	0.06	0.878	0.037	0.897	0.06				0.518	0.071	0.601	0.032	0.546
0.01	0.646	0.007	0.638	0.06	0.878	0.037	0.897	0.06				0.517	0.071	0.601	0.032	0.546
0.01	0.646	0.007	0.639	0.06	0.878	0.037	0.897	0.061				0.516	0.071	0.601	0.032	0.547
0.01	0.646	0.007	0.639	0.061	0.878	0.037	0.897	0.061				0.515	0.071	0.602	0.032	0.547
0.01	0.646	0.007	0.639	0.061	0.878	0.037	0.897	0.062				0.514	0.071	0.602	0.033	0.547
0.01	0.646	0.007	0.639	0.061	0.878	0.037	0.897	0.062				0.513	0.071	0.602	0.033	0.548
0.01	0.648	0.007	0.64	0.061	0.878	0.037	0.897	0.062				0.512	0.071	0.603	0.033	0.548
0.01	0.648	0.007	0.64	0.062	0.88	0.038	0.899	0.062				0.511	0.071	0.603	0.033	0.548
0.01	0.648	0.007	0.64	0.062	0.881	0.038	0.9	0.064				0.51	0.071	0.603	0.033	0.549
0.01	0.648	0.007	0.64	0.062	0.881	0.038	0.9	0.065				0.509	0.071	0.604	0.033	0.549
0.01	0.649	0.007	0.642	0.063	0.881	0.038	0.9	0.066				0.508	0.072	0.604	0.033	0.55
0.01	0.65	0.007	0.643	0.063	0.881	0.038	0.9	0.066				0.507	0.072	0.604	0.033	0.55
0.01	0.65	0.007	0.643	0.063	0.881	0.038	0.9	0.066				0.506	0.072	0.605	0.033	0.55
0.01	0.65	0.007	0.643	0.063	0.881	0.038	0.9	0.066				0.505	0.072	0.605	0.033	0.55
0.01	0.65	0.007	0.643	0.063	0.881	0.038	0.9	0.066				0.504	0.072	0.605	0.033	0.55
0.01	0.65	0.007	0.643	0.063	0.881	0.038	0.9	0.066				0.503	0.072	0.605	0.033	0.55
0.01	0.65	0.007	0.643	0.063	0.881	0.038	0.9	0.066				0.502	0.072	0.605	0.033	0.55
0.01	0.65	0.007	0.643	0.063	0.881	0.038	0.9	0.066				0.501	0.072	0.605	0.033	0.55
0.01	0.653	0.007	0.647	0.063	0.882	0.038	0.902	0.071				0.5	0.072	0.607	0.033	0.552
0.01	0.653	0.007	0.647	0.063	0.882	0.038	0.902	0.071				0.499	0.072	0.607	0.033	0.552
0.01	0.653	0.007	0.647	0.063	0.882	0.038	0.902	0.071				0.498	0.072	0.607	0.033	0.552
0.01	0.653	0.007	0.647	0.063	0.882	0.038	0.902	0.071				0.497	0.072	0.607	0.033	0.552
0.01	0.653	0.007	0.647	0.063	0.882	0.038	0.902	0.071				0.496	0.072	0.607	0.033	0.552
0.01	0.653	0.007	0.647	0.063	0.882	0.038	0.902	0.071				0.495	0.072	0.607	0.033	0.552
0.01	0.654	0.007	0.648	0.063	0.882	0.038	0.902	0.072				0.494	0.072	0.607	0.033	0.553
0.01	0.654	0.007	0.648	0.063	0.883	0.038	0.903	0.073				0.493	0.072	0.607	0.033	0.553
0.01	0.654	0.007	0.648	0.063	0.883	0.038	0.903	0.074				0.492	0.072	0.607	0.033	0.553
0.01	0.654	0.007	0.649	0.063	0.884	0.038	0.904	0.074				0.491	0.073	0.608	0.033	0.553
0.01	0.656	0.007	0.65	0.063	0.884	0.038	0.904	0.074				0.49	0.073	0.608	0.033	0.553
0.01	0.656	0.007	0.65	0.063	0.884	0.038	0.904	0.074				0.489	0.073	0.609	0.033	0.554
0.01	0.657	0.007	0.652	0.063	0.884	0.038	0.904	0.075				0.488	0.073	0.609	0.033	0.554
0.01	0.657	0.007	0.652	0.063	0.884	0.038	0.904	0.076				0.487	0.073	0.609	0.033	0.554
0.01	0.657	0.007	0.652	0.063	0.884	0.038	0.904	0.076				0.486	0.073	0.609	0.033	0.555
0.01	0.658	0.007	0.653	0.063	0.884	0.038	0.904	0.078				0.485	0.073	0.61	0.033	0.555
0.01	0.658	0.007	0.653	0.063	0.885	0.038	0.905	0.078				0.484	0.073	0.61	0.033	0.555
0.01	0.658	0.007	0.653	0.063	0.886	0.038	0.906	0.078				0.483	0.073	0.61	0.033	0.555
0.01	0.658	0.007	0.654	0.064	0.886	0.038	0.906	0.079				0.482	0.073	0.61	0.033	0.556
0.01	0.659	0.007	0.655	0.064	0.886	0.038	0.906	0.08				0.481	0.073	0.611	0.033	0.556
0.01	0.659	0.007	0.655	0.065	0.886	0.038	0.906	0.08				0.48	0.073	0.611	0.033	0.556
0.01	0.662	0.007	0.658	0.065	0.886	0.038	0.906	0.08				0.479	0.073	0.611	0.033	0.556
0.01	0.662	0.007	0.659	0.066	0.886	0.038	0.906	0.08				0.478	0.073	0.612	0.033	0.557
0.011	0.663	0.007	0.66	0.066	0.887	0.038	0.907	0.081				0.477	0.073	0.612	0.033	0.557
0.011	0.663	0.007	0.66	0.066	0.887	0.038	0.907	0.082				0.476	0.073	0.612	0.033	0.557
0.011	0.663	0.007	0.66	0.066	0.887	0.038	0.907	0.082				0.475	0.073	0.612	0.033	0.557
0.011	0.664	0.007	0.662	0.066	0.887	0.038	0.907	0.083				0.474	0.073	0.612	0.033	0.557
0.011	0.665	0.007	0.663	0.066	0.888	0.038	0.908	0.083				0.473	0.073	0.613	0.033	0.558
0.011	0.665	0.007	0.663	0.066	0.888	0.038	0.908	0.085				0.472	0.073	0.613	0.033	0.558
0.011	0.666	0.007	0.664	0.067	0.889	0.039	0.908	0.086				0.471	0.073	0.613	0.033	0.558
0.011	0.667	0.007	0.666	0.067	0.889	0.039	0.908	0.086				0.47	0.073	0.613	0.033	0.559
0.011	0.668	0.007	0.667	0.068	0.889	0.04	0.908	0.086				0.469	0.074	0.613	0.033	0.559
0.011	0.668	0.007	0.667	0.069	0.89	0.04	0.908	0.086				0.468	0.074	0.613	0.033	0.559
0.011	0.668	0.007	0.667	0.07	0.89	0.04	0.908	0.086				0.467	0.074	0.614	0.033	0.559
0.011	0.668	0.007	0.667	0.07	0.89	0.04	0.908	0.087				0.466	0.074	0.614	0.033	0.559
0.011	0.669	0.007	0.668	0.07	0.89	0.041	0.908	0.088				0.465	0.074	0.614	0.033	0.559
0.011	0.669	0.007	0.668	0.072	0.89	0.043	0.909	0.089				0.464	0.074	0.615	0.033	0.56
0.011	0.669	0.007	0.668	0.072	0.89	0.043	0.909	0.089				0.463	0.074	0.615	0.033	0.56
0.011	0.669	0.007	0.668	0.072	0.89	0.043	0.909	0.09				0.462	0.074	0.615	0.033	0.56
0.011	0.669	0.007	0.668	0.072	0.89	0.043	0.909	0.091				0.461	0.074	0.615	0.033	0.561
0.011	0.67	0.007	0.669	0.072	0.89	0.043	0.909	0.092				0.46	0.074	0.616	0.033	0.561
0.011	0.67	0.007	0.669	0.072	0.89	0.043	0.909	0.094				0.459	0.074	0.616	0.033	0.561
0.011	0.67	0.007	0.669	0.072	0.89	0.043	0.909	0.094				0.458	0.074	0.616	0.033	0.562
0.011	0.67	0.007	0.669	0.072	0.89	0.043	0.909	0.095				0.457	0.075	0.617	0.033	0.562
0.011	0.671	0.007	0.67	0.072	0.89	0.043	0.909	0.095				0.456	0.075	0.617	0.033	0.562
0.011	0.671	0.007	0.67	0.072	0.89	0.043	0.909	0.095				0.455	0.075	0.617	0.033	0.563
0.011	0.671	0.007	0.67	0.072	0.89	0.043	0.909	0.096				0.454	0.075	0.618	0.034	0.563
0.011	0.672	0.007	0.671	0.072	0.89	0.043	0.909	0.096				0.453	0.075	0.618	0.034	0.563
0.011	0.673	0.007	0.671	0.072	0.89	0.043	0.909	0.098				0.452	0.075	0.618	0.034	0.563
0.011	0.675	0.007	0.674	0.073	0.891	0.044	0.91	0.098				0.451	0.075	0.618	0.034	0.564
0.011	0.675	0.007	0.674	0.074	0.892	0.045	0.912	0.098				0.45	0.075	0.619	0.034	0.564
0.011	0.676	0.007	0.675	0.074	0.892	0.045	0.912	0.098				0.449	0.075	0.619	0.034	0.565
0.011	0.677	0.007	0.676	0.074	0.893	0.045	0.913	0.098				0.448	0.075	0.619	0.034	0.565
0.011	0.677	0.007	0.676	0.074	0.893	0.045	0.913	0.099				0.447	0.075	0.619	0.034	0.565
0.011	0.678	0.007	0.677	0.074	0.893	0.045	0.913	0.1				0.446	0.075	0.619	0.034	0.565
0.011	0.678	0.007	0.677	0.074	0.893	0.046	0.913	0.101				0.445	0.075	0.62	0.034	0.565
0.011	0.678	0.007	0.677	0.074	0.893	0.046	0.913	0.102				0.444	0.075	0.62	0.034	0.566
0.011	0.678	0.007	0.677	0.075	0.894	0.048	0.914	0.102				0.443	0.075	0.621	0.034	0.567
0.011	0.678	0.007	0.677	0.075	0.894	0.048	0.915	0.103				0.442	0.075	0.621	0.034	0.567
0.012	0.678	0.008	0.677	0.076	0.894	0.049	0.915	0.104				0.441	0.075	0.621	0.034	0.567
0.012	0.678	0.008	0.677	0.077	0.894	0.05	0.915	0.106				0.44	0.075	0.621	0.034	0.567
0.012	0.679	0.008	0.678	0.077	0.894	0.05	0.915	0.106				0.439	0.075	0.621	0.034	0.567
0.013	0.679	0.009	0.678	0.077	0.894	0.05	0.915	0.106				0.438	0.075	0.622	0.034	0.568
0.013	0.679	0.009	0.678	0.077	0.894	0.05	0.915	0.106				0.437	0.075	0.622	0.034	0.568
0.013	0.679	0.009	0.678	0.077	0.895	0.05	0.916	0.106				0.436	0.075	0.622	0.034	0.568
0.013	0.682	0.009	0.681	0.077	0.895	0.05	0.916	0.106				0.435	0.076	0.622	0.034	0.568
0.013	0.682	0.009	0.681	0.077	0.895	0.05	0.916	0.106				0.434	0.076	0.622	0.034	0.568
0.013	0.685	0.009	0.685	0.077	0.895	0.05	0.916	0.106				0.433	0.076	0.623	0.034	0.569
0.014	0.685	0.009	0.685	0.078	0.895	0.051	0.916	0.11				0.432	0.076	0.623	0.034	0.569
0.014	0.686	0.009	0.686	0.078	0.895	0.051	0.916	0.11				0.431	0.076	0.623	0.034	0.569
0.014	0.687	0.009	0.687	0.079	0.895	0.052	0.916	0.11				0.43	0.076	0.624	0.034	0.57
0.014	0.687	0.009	0.687	0.079	0.895	0.052	0.916	0.111				0.429	0.076	0.624	0.034	0.57
0.014	0.688	0.009	0.688	0.079	0.895	0.052	0.916	0.113				0.428	0.076	0.624	0.034	0.57
0.014	0.688	0.009	0.688	0.079	0.895	0.052	0.916	0.113				0.427	0.076	0.624	0.034	0.57
0.014	0.688	0.009	0.688	0.079	0.895	0.052	0.916	0.114				0.426	0.076	0.625	0.034	0.571
0.014	0.688	0.009	0.688	0.079	0.895	0.052	0.916	0.117				0.425	0.076	0.625	0.034	0.571
0.014	0.688	0.009	0.688	0.079	0.896	0.052	0.917	0.118				0.424	0.076	0.625	0.034	0.571
0.014	0.688	0.009	0.688	0.08	0.896	0.053	0.917	0.119				0.423	0.076	0.626	0.034	0.572
0.014	0.688	0.009	0.688	0.08	0.896	0.053	0.917	0.122				0.422	0.076	0.626	0.034	0.572
0.014	0.689	0.009	0.689	0.08	0.896	0.053	0.917	0.122				0.421	0.076	0.627	0.034	0.573
0.014	0.69	0.009	0.691	0.081	0.896	0.054	0.917	0.122				0.42	0.076	0.627	0.034	0.573
0.014	0.69	0.009	0.691	0.081	0.897	0.054	0.917	0.122				0.419	0.076	0.627	0.034	0.573
0.014	0.692	0.009	0.694	0.081	0.897	0.054	0.917	0.123				0.418	0.076	0.627	0.034	0.573
0.014	0.693	0.009	0.694	0.082	0.898	0.054	0.918	0.127				0.417	0.076	0.628	0.034	0.574
0.014	0.693	0.009	0.694	0.082	0.898	0.054	0.918	0.129				0.416	0.077	0.628	0.035	0.574
0.014	0.694	0.009	0.696	0.083	0.898	0.055	0.918	0.13				0.415	0.077	0.628	0.035	0.574
0.014	0.694	0.009	0.696	0.083	0.898	0.055	0.918	0.13				0.414	0.077	0.628	0.035	0.575
0.014	0.695	0.01	0.696	0.083	0.898	0.055	0.918	0.131				0.413	0.077	0.629	0.035	0.575
0.014	0.695	0.01	0.696	0.083	0.898	0.055	0.918	0.131				0.412	0.077	0.629	0.035	0.575
0.015	0.696	0.011	0.697	0.083	0.898	0.055	0.918	0.132				0.411	0.077	0.629	0.035	0.575
0.015	0.696	0.011	0.697	0.085	0.898	0.056	0.918	0.133				0.41	0.077	0.629	0.035	0.575
0.015	0.697	0.011	0.698	0.085	0.898	0.056	0.919	0.133				0.409	0.077	0.629	0.035	0.575
0.015	0.698	0.011	0.699	0.085	0.899	0.056	0.92	0.134				0.408	0.077	0.629	0.035	0.576
0.015	0.698	0.011	0.7	0.085	0.899	0.056	0.92	0.137				0.407	0.078	0.63	0.035	0.576
0.017	0.699	0.012	0.7	0.085	0.899	0.056	0.92	0.138				0.406	0.078	0.63	0.035	0.576
0.017	0.699	0.012	0.7	0.086	0.899	0.056	0.92	0.138				0.405	0.078	0.63	0.035	0.576
0.018	0.7	0.013	0.701	0.086	0.899	0.056	0.92	0.138				0.404	0.078	0.63	0.035	0.576
0.018	0.7	0.013	0.701	0.086	0.899	0.056	0.92	0.141				0.403	0.078	0.63	0.035	0.576
0.018	0.702	0.013	0.704	0.086	0.899	0.056	0.92	0.142				0.402	0.078	0.63	0.035	0.577
0.018	0.702	0.013	0.704	0.086	0.9	0.056	0.921	0.144				0.401	0.078	0.63	0.035	0.577
0.018	0.703	0.013	0.706	0.086	0.9	0.056	0.921	0.145				0.4	0.078	0.631	0.035	0.577
0.019	0.704	0.014	0.707	0.086	0.901	0.056	0.923	0.146				0.399	0.078	0.631	0.035	0.577
0.019	0.705	0.014	0.708	0.086	0.901	0.056	0.923	0.146				0.398	0.078	0.631	0.035	0.578
0.019	0.706	0.014	0.709	0.086	0.901	0.056	0.923	0.146				0.397	0.079	0.631	0.036	0.578
0.019	0.706	0.014	0.709	0.086	0.901	0.056	0.923	0.147				0.396	0.079	0.631	0.036	0.578
0.019	0.707	0.014	0.71	0.087	0.901	0.058	0.923	0.147				0.395	0.079	0.631	0.036	0.578
0.019	0.709	0.014	0.711	0.087	0.901	0.058	0.923	0.15				0.394	0.079	0.631	0.036	0.578
0.019	0.709	0.014	0.711	0.087	0.901	0.058	0.923	0.15				0.393	0.079	0.632	0.036	0.578
0.019	0.709	0.014	0.711	0.087	0.901	0.058	0.923	0.151				0.392	0.079	0.632	0.036	0.578
0.019	0.71	0.014	0.713	0.087	0.901	0.058	0.923	0.152				0.391	0.079	0.632	0.036	0.578
0.019	0.711	0.014	0.715	0.087	0.901	0.058	0.923	0.152				0.39	0.079	0.632	0.036	0.579
0.019	0.713	0.014	0.717	0.087	0.902	0.058	0.923	0.153				0.389	0.079	0.632	0.036	0.579
0.019	0.715	0.014	0.72	0.087	0.902	0.058	0.923	0.154				0.388	0.079	0.633	0.036	0.579
0.019	0.715	0.014	0.72	0.087	0.902	0.058	0.923	0.155				0.387	0.079	0.633	0.036	0.579
0.019	0.718	0.014	0.722	0.087	0.902	0.058	0.923	0.157				0.386	0.079	0.633	0.036	0.58
0.019	0.718	0.014	0.723	0.087	0.902	0.058	0.924	0.158				0.385	0.08	0.634	0.036	0.58
0.019	0.719	0.014	0.725	0.087	0.902	0.058	0.924	0.16				0.384	0.08	0.634	0.036	0.58
0.019	0.72	0.014	0.726	0.087	0.902	0.058	0.924	0.162				0.383	0.08	0.634	0.036	0.58
0.019	0.72	0.014	0.726	0.087	0.902	0.058	0.924	0.163				0.382	0.08	0.634	0.036	0.58
0.02	0.72	0.014	0.726	0.088	0.902	0.059	0.924	0.163				0.381	0.08	0.634	0.036	0.581
0.021	0.721	0.015	0.727	0.089	0.902	0.06	0.924	0.168				0.38	0.08	0.635	0.037	0.581
0.022	0.722	0.017	0.728	0.09	0.902	0.061	0.924	0.17				0.379	0.08	0.635	0.037	0.582
0.022	0.722	0.017	0.729	0.09	0.903	0.061	0.925	0.17				0.378	0.08	0.636	0.037	0.582
0.022	0.722	0.017	0.729	0.09	0.903	0.061	0.925	0.17				0.377	0.08	0.636	0.037	0.582
0.022	0.722	0.017	0.729	0.09	0.903	0.061	0.925	0.171				0.376	0.08	0.636	0.037	0.583
0.022	0.725	0.018	0.732	0.09	0.903	0.061	0.925	0.172				0.375	0.08	0.636	0.037	0.583
0.022	0.725	0.018	0.732	0.09	0.903	0.061	0.925	0.173				0.374	0.08	0.637	0.037	0.583
0.022	0.726	0.018	0.733	0.09	0.904	0.061	0.925	0.174				0.373	0.08	0.637	0.037	0.584
0.023	0.726	0.019	0.735	0.09	0.904	0.061	0.925	0.174				0.372	0.08	0.637	0.037	0.584
0.023	0.726	0.019	0.735	0.09	0.904	0.061	0.925	0.177				0.371	0.08	0.638	0.037	0.585
0.023	0.726	0.019	0.735	0.091	0.904	0.061	0.925	0.181				0.37	0.08	0.638	0.037	0.585
0.023	0.726	0.019	0.735	0.091	0.905	0.061	0.926	0.182				0.369	0.08	0.639	0.037	0.585
0.023	0.726	0.019	0.735	0.092	0.905	0.062	0.926	0.182				0.368	0.081	0.639	0.037	0.585
0.023	0.726	0.019	0.735	0.092	0.906	0.062	0.927	0.185				0.367	0.081	0.639	0.037	0.585
0.023	0.726	0.019	0.735	0.092	0.906	0.062	0.927	0.186				0.366	0.081	0.639	0.037	0.586
0.023	0.726	0.019	0.735	0.094	0.906	0.064	0.927	0.189				0.365	0.081	0.64	0.037	0.586
0.024	0.728	0.02	0.737	0.094	0.906	0.064	0.927	0.19				0.364	0.081	0.64	0.037	0.587
0.024	0.729	0.02	0.738	0.096	0.906	0.065	0.927	0.192				0.363	0.081	0.64	0.037	0.587
0.024	0.73	0.02	0.739	0.097	0.906	0.066	0.928	0.192				0.362	0.081	0.64	0.037	0.587
0.024	0.73	0.02	0.739	0.097	0.907	0.066	0.929	0.195				0.361	0.081	0.641	0.037	0.588
0.024	0.73	0.02	0.74	0.097	0.907	0.066	0.929	0.196				0.36	0.081	0.641	0.037	0.588
0.024	0.731	0.02	0.741	0.097	0.908	0.066	0.93	0.198				0.359	0.081	0.641	0.037	0.588
0.024	0.732	0.02	0.742	0.098	0.909	0.066	0.93	0.198				0.358	0.082	0.641	0.037	0.588
0.024	0.733	0.02	0.743	0.098	0.909	0.067	0.93	0.199				0.357	0.082	0.641	0.037	0.588
0.024	0.733	0.02	0.743	0.098	0.909	0.067	0.93	0.2				0.356	0.082	0.641	0.037	0.588
0.024	0.734	0.02	0.744	0.098	0.909	0.067	0.93	0.203				0.355	0.082	0.641	0.038	0.588
0.025	0.734	0.021	0.744	0.098	0.91	0.067	0.93	0.206				0.354	0.082	0.641	0.038	0.588
0.025	0.735	0.021	0.747	0.099	0.91	0.069	0.93	0.209				0.353	0.082	0.642	0.038	0.588
0.025	0.735	0.021	0.747	0.101	0.911	0.07	0.931	0.211				0.352	0.082	0.642	0.038	0.588
0.025	0.735	0.021	0.747	0.102	0.912	0.07	0.933	0.216				0.351	0.082	0.642	0.038	0.588
0.026	0.735	0.022	0.747	0.103	0.912	0.071	0.933	0.216				0.35	0.082	0.642	0.038	0.589
0.027	0.737	0.024	0.749	0.103	0.913	0.071	0.934	0.217				0.349	0.082	0.642	0.038	0.589
0.027	0.737	0.024	0.749	0.103	0.913	0.071	0.934	0.217				0.348	0.082	0.643	0.038	0.589
0.028	0.738	0.025	0.75	0.103	0.913	0.071	0.934	0.221				0.347	0.083	0.643	0.038	0.59
0.029	0.738	0.027	0.75	0.103	0.913	0.071	0.934	0.223				0.346	0.083	0.643	0.038	0.59
0.029	0.738	0.027	0.751	0.104	0.914	0.072	0.935	0.226				0.345	0.083	0.643	0.038	0.59
0.03	0.738	0.028	0.751	0.104	0.914	0.072	0.935	0.23				0.344	0.083	0.643	0.038	0.59
0.03	0.738	0.028	0.751	0.104	0.916	0.072	0.935	0.237				0.343	0.083	0.643	0.038	0.59
0.03	0.738	0.028	0.751	0.106	0.917	0.072	0.935	0.238				0.342	0.083	0.643	0.038	0.59
0.03	0.738	0.029	0.751	0.106	0.917	0.072	0.935	0.242				0.341	0.083	0.643	0.038	0.59
0.031	0.739	0.03	0.752	0.106	0.918	0.072	0.936	0.242				0.34	0.083	0.644	0.038	0.59
0.032	0.739	0.031	0.752	0.106	0.918	0.072	0.936	0.245				0.339	0.083	0.644	0.039	0.591
0.032	0.74	0.031	0.753	0.106	0.919	0.072	0.937	0.246				0.338	0.084	0.644	0.039	0.591
0.033	0.742	0.032	0.756	0.106	0.919	0.072	0.937	0.248				0.337	0.084	0.644	0.039	0.591
0.034	0.742	0.033	0.756	0.107	0.919	0.073	0.937	0.252				0.336	0.084	0.644	0.039	0.591
0.035	0.742	0.034	0.757	0.107	0.921	0.073	0.938	0.255				0.335	0.084	0.645	0.039	0.591
0.035	0.742	0.034	0.757	0.107	0.921	0.073	0.938	0.257				0.334	0.085	0.645	0.039	0.592
0.035	0.742	0.034	0.757	0.107	0.922	0.073	0.939	0.259				0.333	0.085	0.645	0.039	0.592
0.035	0.743	0.034	0.758	0.107	0.922	0.073	0.939	0.261				0.332	0.085	0.645	0.039	0.592
0.036	0.744	0.035	0.759	0.108	0.922	0.074	0.939	0.266				0.331	0.085	0.646	0.039	0.593
0.036	0.744	0.035	0.759	0.108	0.922	0.074	0.939	0.268				0.33	0.085	0.646	0.039	0.593
0.036	0.744	0.035	0.759	0.109	0.922	0.074	0.939	0.27				0.329	0.085	0.646	0.039	0.593
0.036	0.744	0.035	0.759	0.11	0.922	0.075	0.94	0.273				0.328	0.085	0.647	0.039	0.594
0.037	0.745	0.037	0.76	0.11	0.922	0.075	0.94	0.277				0.327	0.085	0.647	0.039	0.594
0.037	0.746	0.037	0.761	0.11	0.922	0.075	0.94	0.282				0.326	0.085	0.647	0.039	0.594
0.037	0.746	0.037	0.761	0.11	0.922	0.075	0.94	0.286				0.325	0.085	0.647	0.039	0.594
0.038	0.746	0.039	0.761	0.11	0.922	0.075	0.94	0.29				0.324	0.085	0.647	0.039	0.594
0.038	0.746	0.039	0.761	0.11	0.922	0.075	0.94	0.29				0.323	0.085	0.648	0.039	0.594
0.039	0.746	0.04	0.761	0.11	0.922	0.075	0.94	0.292				0.322	0.085	0.648	0.039	0.595
0.039	0.747	0.04	0.761	0.11	0.923	0.075	0.941	0.292				0.321	0.085	0.648	0.039	0.595
0.04	0.748	0.041	0.761	0.11	0.923	0.075	0.941	0.298				0.32	0.085	0.648	0.039	0.595
0.042	0.748	0.043	0.761	0.11	0.923	0.075	0.941	0.304				0.319	0.086	0.649	0.04	0.596
0.042	0.748	0.044	0.761	0.111	0.923	0.075	0.941	0.306				0.318	0.086	0.649	0.04	0.596
0.042	0.748	0.044	0.761	0.111	0.924	0.075	0.941	0.307				0.317	0.086	0.649	0.04	0.596
0.042	0.748	0.044	0.761	0.111	0.924	0.075	0.941	0.308				0.316	0.086	0.649	0.04	0.596
0.042	0.748	0.044	0.761	0.111	0.924	0.075	0.941	0.314				0.315	0.086	0.649	0.04	0.596
0.043	0.749	0.045	0.761	0.112	0.924	0.076	0.941	0.315				0.314	0.086	0.65	0.04	0.597
0.045	0.75	0.048	0.762	0.112	0.924	0.076	0.941	0.318				0.313	0.086	0.65	0.04	0.597
0.046	0.75	0.049	0.762	0.112	0.924	0.076	0.941	0.32				0.312	0.086	0.65	0.04	0.597
0.046	0.75	0.049	0.762	0.113	0.925	0.076	0.942	0.322				0.311	0.086	0.65	0.04	0.597
0.047	0.75	0.05	0.762	0.113	0.925	0.076	0.942	0.324				0.31	0.087	0.65	0.041	0.597
0.047	0.75	0.05	0.762	0.113	0.926	0.076	0.942	0.33				0.309	0.087	0.65	0.041	0.598
0.049	0.75	0.052	0.762	0.113	0.926	0.076	0.944	0.33				0.308	0.087	0.651	0.041	0.598
0.05	0.75	0.054	0.762	0.113	0.926	0.076	0.944	0.331				0.307	0.087	0.651	0.041	0.598
0.051	0.75	0.055	0.762	0.113	0.927	0.076	0.945	0.334				0.306	0.087	0.652	0.041	0.599
0.052	0.75	0.056	0.762	0.113	0.927	0.076	0.945	0.336				0.305	0.087	0.652	0.041	0.599
0.053	0.75	0.056	0.762	0.113	0.927	0.076	0.945	0.338				0.304	0.087	0.652	0.041	0.599
0.053	0.752	0.056	0.764	0.113	0.928	0.076	0.945	0.339				0.303	0.087	0.652	0.041	0.599
0.053	0.754	0.056	0.767	0.113	0.928	0.076	0.945	0.34				0.302	0.087	0.652	0.041	0.6
0.054	0.754	0.058	0.767	0.114	0.928	0.077	0.945	0.342				0.301	0.087	0.652	0.041	0.6
0.054	0.754	0.058	0.767	0.114	0.928	0.077	0.945	0.342				0.3	0.087	0.653	0.041	0.6
0.055	0.754	0.059	0.767	0.114	0.928	0.079	0.945	0.342				0.299	0.088	0.653	0.041	0.6
0.055	0.754	0.059	0.767	0.115	0.928	0.079	0.945	0.345				0.298	0.088	0.653	0.041	0.601
0.057	0.754	0.06	0.767	0.116	0.928	0.08	0.945	0.346				0.297	0.088	0.654	0.041	0.601
0.057	0.754	0.06	0.767	0.116	0.928	0.08	0.945	0.346				0.296	0.088	0.654	0.041	0.601
0.058	0.754	0.061	0.767	0.116	0.929	0.08	0.945	0.348				0.295	0.088	0.654	0.041	0.602
0.058	0.754	0.061	0.767	0.116	0.929	0.08	0.945	0.352				0.294	0.088	0.654	0.041	0.602
0.058	0.754	0.061	0.767	0.117	0.93	0.081	0.945	0.354				0.293	0.088	0.655	0.041	0.602
0.058	0.754	0.061	0.767	0.118	0.93	0.081	0.946	0.356				0.292	0.089	0.655	0.041	0.602
0.058	0.754	0.062	0.767	0.118	0.932	0.081	0.948	0.357				0.291	0.089	0.655	0.042	0.603
0.06	0.754	0.063	0.767	0.118	0.932	0.081	0.948	0.358				0.29	0.089	0.655	0.042	0.603
0.061	0.755	0.064	0.767	0.118	0.932	0.081	0.948	0.358				0.289	0.089	0.656	0.042	0.603
0.062	0.756	0.066	0.768	0.118	0.932	0.081	0.948	0.359				0.288	0.089	0.656	0.042	0.603
0.064	0.756	0.067	0.768	0.118	0.932	0.081	0.948	0.36				0.287	0.089	0.656	0.042	0.604
0.065	0.756	0.069	0.768	0.118	0.932	0.082	0.948	0.361				0.286	0.089	0.656	0.042	0.604
0.066	0.756	0.071	0.768	0.119	0.933	0.082	0.948	0.361				0.285	0.089	0.657	0.042	0.605
0.066	0.756	0.071	0.768	0.119	0.934	0.082	0.949	0.362				0.284	0.09	0.657	0.042	0.605
0.066	0.756	0.071	0.768	0.119	0.934	0.082	0.949	0.362				0.283	0.09	0.657	0.042	0.605
0.066	0.757	0.071	0.768	0.12	0.934	0.082	0.949	0.363				0.282	0.09	0.658	0.042	0.606
0.067	0.758	0.072	0.769	0.12	0.934	0.082	0.949	0.364				0.281	0.09	0.658	0.042	0.606
0.068	0.759	0.072	0.771	0.12	0.934	0.082	0.949	0.364				0.28	0.09	0.659	0.042	0.607
0.068	0.759	0.072	0.771	0.12	0.934	0.082	0.949	0.365				0.279	0.09	0.659	0.042	0.607
0.068	0.759	0.072	0.771	0.121	0.934	0.083	0.949	0.366				0.278	0.09	0.659	0.042	0.607
0.069	0.759	0.073	0.771	0.122	0.934	0.084	0.949	0.366				0.277	0.09	0.659	0.042	0.608
0.07	0.759	0.074	0.771	0.122	0.934	0.084	0.949	0.367				0.276	0.09	0.66	0.042	0.608
0.07	0.759	0.074	0.771	0.122	0.934	0.084	0.949	0.368				0.275	0.09	0.66	0.042	0.608
0.07	0.76	0.074	0.772	0.123	0.934	0.085	0.949	0.371				0.274	0.09	0.66	0.042	0.608
0.07	0.76	0.074	0.772	0.123	0.936	0.085	0.95	0.372				0.273	0.09	0.663	0.042	0.612
0.07	0.76	0.074	0.772	0.124	0.936	0.086	0.95	0.372				0.272	0.09	0.664	0.042	0.613
0.07	0.76	0.074	0.772	0.124	0.936	0.086	0.95	0.372				0.271	0.09	0.665	0.042	0.613
0.07	0.761	0.075	0.773	0.124	0.936	0.086	0.95	0.373				0.27	0.09	0.665	0.042	0.613
0.071	0.761	0.076	0.773	0.124	0.937	0.086	0.951	0.374				0.269	0.09	0.665	0.042	0.614
0.072	0.761	0.077	0.773	0.124	0.937	0.086	0.951	0.374				0.268	0.09	0.665	0.042	0.614
0.072	0.761	0.077	0.773	0.124	0.937	0.086	0.951	0.375				0.267	0.09	0.666	0.042	0.615
0.074	0.762	0.08	0.774	0.125	0.937	0.086	0.951	0.376				0.266	0.091	0.666	0.042	0.615
0.075	0.762	0.082	0.774	0.125	0.937	0.086	0.951	0.376				0.265	0.091	0.667	0.042	0.616
0.075	0.762	0.082	0.774	0.125	0.938	0.086	0.951	0.376				0.264	0.091	0.667	0.042	0.616
0.076	0.762	0.083	0.774	0.125	0.938	0.086	0.951	0.379				0.263	0.091	0.668	0.042	0.617
0.077	0.762	0.084	0.774	0.126	0.938	0.087	0.951	0.38				0.262	0.091	0.668	0.043	0.617
0.078	0.762	0.086	0.774	0.126	0.939	0.087	0.951	0.38				0.261	0.091	0.669	0.043	0.618
0.08	0.762	0.088	0.774	0.127	0.939	0.088	0.951	0.38				0.26	0.091	0.669	0.043	0.619
0.08	0.762	0.088	0.774	0.128	0.94	0.09	0.952	0.38				0.259	0.092	0.67	0.043	0.619
0.082	0.762	0.091	0.775	0.13	0.941	0.091	0.954	0.38				0.258	0.092	0.67	0.043	0.619
0.082	0.762	0.092	0.775	0.13	0.942	0.092	0.954	0.381				0.257	0.092	0.67	0.043	0.62
0.082	0.762	0.092	0.775	0.13	0.942	0.092	0.954	0.382				0.256	0.092	0.67	0.043	0.62
0.082	0.763	0.092	0.777	0.13	0.942	0.092	0.954	0.382				0.255	0.092	0.67	0.043	0.62
0.084	0.764	0.094	0.778	0.13	0.942	0.092	0.954	0.382				0.254	0.092	0.671	0.044	0.62
0.085	0.764	0.095	0.778	0.131	0.942	0.093	0.954	0.384				0.253	0.092	0.671	0.044	0.621
0.085	0.765	0.095	0.779	0.131	0.942	0.093	0.954	0.386				0.252	0.092	0.672	0.044	0.621
0.085	0.766	0.095	0.779	0.131	0.942	0.093	0.954	0.387				0.251	0.092	0.672	0.044	0.622
0.086	0.766	0.096	0.779	0.131	0.942	0.093	0.954	0.39				0.25	0.093	0.672	0.044	0.622
0.086	0.766	0.097	0.779	0.131	0.942	0.093	0.954	0.39				0.249	0.093	0.673	0.044	0.622
0.086	0.766	0.097	0.78	0.131	0.943	0.093	0.954	0.39				0.248	0.093	0.673	0.044	0.622
0.086	0.768	0.097	0.782	0.132	0.943	0.093	0.954	0.39				0.247	0.093	0.673	0.044	0.623
0.086	0.77	0.097	0.784	0.132	0.943	0.093	0.954	0.39				0.246	0.093	0.673	0.044	0.623
0.087	0.77	0.098	0.784	0.133	0.943	0.094	0.954	0.392				0.245	0.093	0.674	0.044	0.623
0.087	0.77	0.098	0.784	0.134	0.943	0.095	0.954	0.392				0.244	0.093	0.674	0.044	0.623
0.088	0.77	0.1	0.785	0.137	0.943	0.097	0.954	0.392				0.243	0.093	0.674	0.045	0.624
0.088	0.77	0.1	0.785	0.138	0.943	0.097	0.954	0.394				0.242	0.093	0.674	0.045	0.624
0.09	0.77	0.102	0.785	0.138	0.943	0.098	0.954	0.395				0.241	0.094	0.674	0.045	0.624
0.09	0.77	0.102	0.785	0.138	0.943	0.098	0.954	0.395				0.24	0.094	0.674	0.045	0.624
0.091	0.77	0.103	0.785	0.138	0.944	0.098	0.954	0.395				0.239	0.094	0.675	0.045	0.625
0.093	0.77	0.105	0.785	0.141	0.945	0.1	0.954	0.396				0.238	0.094	0.675	0.045	0.625
0.093	0.771	0.105	0.787	0.141	0.945	0.1	0.954	0.396				0.237	0.095	0.675	0.045	0.625
0.094	0.771	0.106	0.787	0.142	0.945	0.102	0.954	0.396				0.236	0.095	0.675	0.045	0.625
0.094	0.771	0.107	0.787	0.143	0.945	0.103	0.954	0.398				0.235	0.095	0.675	0.046	0.626
0.095	0.771	0.108	0.787	0.143	0.946	0.103	0.954	0.4				0.234	0.095	0.676	0.046	0.626
0.097	0.772	0.111	0.788	0.144	0.946	0.104	0.954	0.401				0.233	0.095	0.676	0.046	0.626
0.098	0.773	0.113	0.789	0.145	0.946	0.104	0.954	0.401				0.232	0.095	0.676	0.046	0.626
0.098	0.773	0.113	0.789	0.145	0.946	0.104	0.954	0.401				0.231	0.095	0.676	0.046	0.626
0.099	0.773	0.114	0.789	0.145	0.946	0.104	0.954	0.402				0.23	0.095	0.676	0.046	0.627
0.099	0.774	0.114	0.791	0.145	0.946	0.104	0.954	0.402				0.229	0.095	0.677	0.046	0.627
0.1	0.774	0.115	0.791	0.146	0.946	0.104	0.954	0.403				0.228	0.095	0.677	0.046	0.627
0.1	0.776	0.115	0.792	0.146	0.946	0.104	0.955	0.404				0.227	0.096	0.678	0.046	0.628
0.101	0.778	0.116	0.794	0.146	0.947	0.104	0.955	0.405				0.226	0.096	0.678	0.046	0.628
0.102	0.778	0.117	0.794	0.146	0.947	0.104	0.955	0.406				0.225	0.096	0.678	0.047	0.628
0.102	0.778	0.117	0.794	0.146	0.948	0.104	0.955	0.406				0.224	0.096	0.678	0.047	0.628
0.102	0.778	0.117	0.794	0.147	0.948	0.104	0.955	0.407				0.223	0.096	0.678	0.047	0.628
0.102	0.778	0.117	0.795	0.147	0.948	0.104	0.955	0.407				0.222	0.097	0.678	0.047	0.629
0.102	0.778	0.118	0.795	0.148	0.948	0.105	0.955	0.407				0.221	0.097	0.679	0.047	0.629
0.102	0.778	0.118	0.795	0.149	0.949	0.106	0.956	0.408				0.22	0.097	0.679	0.048	0.629
0.104	0.778	0.121	0.795	0.15	0.949	0.107	0.956	0.409				0.219	0.097	0.679	0.048	0.629
0.105	0.778	0.122	0.795	0.15	0.949	0.107	0.956	0.409				0.218	0.097	0.68	0.048	0.63
0.106	0.779	0.124	0.796	0.154	0.949	0.111	0.956	0.41				0.217	0.097	0.68	0.048	0.63
0.106	0.779	0.124	0.796	0.154	0.949	0.111	0.956	0.41				0.216	0.098	0.681	0.048	0.631
0.106	0.779	0.124	0.796	0.156	0.949	0.113	0.956	0.41				0.215	0.098	0.681	0.048	0.631
0.106	0.78	0.124	0.798	0.156	0.949	0.113	0.956	0.413				0.214	0.098	0.682	0.048	0.632
0.106	0.782	0.124	0.799	0.157	0.95	0.113	0.957	0.413				0.213	0.098	0.682	0.048	0.632
0.107	0.782	0.125	0.799	0.157	0.95	0.113	0.957	0.415				0.212	0.098	0.682	0.048	0.632
0.107	0.782	0.125	0.8	0.157	0.95	0.113	0.957	0.417				0.211	0.098	0.683	0.048	0.633
0.107	0.783	0.125	0.8	0.157	0.95	0.113	0.957	0.418				0.21	0.098	0.683	0.048	0.633
0.108	0.783	0.126	0.8	0.157	0.951	0.113	0.957	0.418				0.209	0.099	0.683	0.048	0.633
0.109	0.783	0.127	0.8	0.157	0.951	0.113	0.957	0.418				0.208	0.099	0.683	0.048	0.633
0.109	0.783	0.127	0.8	0.158	0.951	0.115	0.957	0.418				0.207	0.099	0.683	0.048	0.634
0.109	0.783	0.127	0.8	0.16	0.951	0.116	0.957	0.42				0.206	0.099	0.684	0.048	0.634
0.11	0.784	0.128	0.801	0.162	0.953	0.117	0.959	0.421				0.205	0.099	0.684	0.048	0.634
0.11	0.784	0.129	0.801	0.162	0.954	0.117	0.96	0.422				0.204	0.1	0.685	0.049	0.635
0.11	0.784	0.129	0.801	0.162	0.954	0.117	0.961	0.422				0.203	0.1	0.685	0.049	0.636
0.11	0.784	0.129	0.801	0.163	0.954	0.118	0.961	0.423				0.202	0.1	0.686	0.049	0.636
0.11	0.784	0.129	0.801	0.163	0.954	0.118	0.961	0.425				0.201	0.1	0.686	0.049	0.637
0.111	0.785	0.131	0.802	0.164	0.954	0.119	0.961	0.425				0.2	0.1	0.686	0.049	0.637
0.111	0.786	0.131	0.803	0.165	0.956	0.119	0.962	0.426				0.199	0.101	0.687	0.049	0.638
0.111	0.786	0.131	0.803	0.166	0.956	0.121	0.962	0.426				0.198	0.101	0.687	0.05	0.638
0.112	0.786	0.132	0.803	0.166	0.956	0.121	0.962	0.426				0.197	0.101	0.687	0.05	0.638
0.113	0.786	0.133	0.803	0.166	0.956	0.121	0.962	0.426				0.196	0.101	0.687	0.05	0.638
0.113	0.787	0.133	0.804	0.168	0.956	0.123	0.962	0.426				0.195	0.101	0.688	0.05	0.639
0.113	0.788	0.133	0.805	0.168	0.957	0.123	0.962	0.426				0.194	0.101	0.688	0.05	0.639
0.113	0.789	0.133	0.805	0.168	0.958	0.123	0.962	0.426				0.193	0.101	0.689	0.05	0.64
0.113	0.789	0.133	0.805	0.168	0.958	0.123	0.962	0.427				0.192	0.102	0.689	0.05	0.64
0.114	0.789	0.135	0.805	0.168	0.958	0.123	0.963	0.427				0.191	0.102	0.689	0.05	0.64
0.115	0.789	0.135	0.805	0.168	0.958	0.123	0.963	0.427				0.19	0.102	0.689	0.05	0.64
0.116	0.79	0.136	0.808	0.17	0.958	0.125	0.963	0.428				0.189	0.102	0.69	0.05	0.641
0.116	0.79	0.136	0.808	0.17	0.96	0.125	0.965	0.428				0.188	0.102	0.691	0.051	0.641
0.117	0.79	0.137	0.808	0.17	0.96	0.125	0.965	0.43				0.187	0.102	0.691	0.051	0.642
0.118	0.79	0.138	0.808	0.172	0.96	0.126	0.965	0.43				0.186	0.102	0.692	0.051	0.642
0.118	0.79	0.139	0.808	0.174	0.96	0.128	0.965	0.43				0.185	0.102	0.692	0.051	0.643
0.118	0.792	0.139	0.809	0.175	0.96	0.131	0.965	0.433				0.184	0.103	0.692	0.051	0.643
0.119	0.792	0.14	0.809	0.178	0.96	0.132	0.965	0.433				0.183	0.103	0.692	0.051	0.643
0.119	0.793	0.14	0.81	0.178	0.96	0.132	0.965	0.433				0.182	0.103	0.692	0.051	0.643
0.121	0.793	0.143	0.81	0.178	0.96	0.132	0.965	0.433				0.181	0.103	0.693	0.051	0.644
0.122	0.793	0.145	0.81	0.178	0.96	0.132	0.965	0.434				0.18	0.103	0.694	0.051	0.645
0.123	0.793	0.146	0.81	0.18	0.96	0.132	0.965	0.434				0.179	0.103	0.694	0.051	0.645
0.124	0.794	0.147	0.811	0.18	0.96	0.132	0.965	0.435				0.178	0.104	0.695	0.051	0.646
0.124	0.794	0.147	0.811	0.181	0.96	0.133	0.965	0.436				0.177	0.104	0.695	0.051	0.646
0.124	0.794	0.147	0.811	0.182	0.96	0.134	0.965	0.436				0.176	0.104	0.696	0.051	0.646
0.125	0.794	0.147	0.811	0.182	0.96	0.134	0.965	0.437				0.175	0.105	0.696	0.052	0.647
0.125	0.794	0.147	0.811	0.183	0.96	0.134	0.965	0.438				0.174	0.105	0.697	0.052	0.647
0.126	0.796	0.148	0.812	0.184	0.96	0.134	0.965	0.438				0.173	0.105	0.697	0.052	0.648
0.126	0.796	0.148	0.812	0.185	0.962	0.134	0.966	0.44				0.172	0.105	0.697	0.052	0.648
0.127	0.797	0.149	0.812	0.185	0.962	0.134	0.967	0.44				0.171	0.105	0.697	0.052	0.648
0.127	0.797	0.149	0.812	0.186	0.963	0.135	0.967	0.442				0.17	0.106	0.698	0.052	0.648
0.127	0.798	0.149	0.814	0.186	0.963	0.135	0.967	0.443				0.169	0.106	0.699	0.052	0.65
0.128	0.798	0.15	0.814	0.187	0.963	0.137	0.967	0.445				0.168	0.106	0.699	0.052	0.65
0.128	0.8	0.15	0.816	0.19	0.963	0.139	0.967	0.446				0.167	0.106	0.7	0.053	0.651
0.128	0.8	0.15	0.816	0.192	0.963	0.142	0.967	0.446				0.166	0.106	0.701	0.053	0.652
0.129	0.8	0.152	0.816	0.193	0.963	0.142	0.967	0.447				0.165	0.106	0.701	0.053	0.652
0.13	0.8	0.152	0.816	0.193	0.964	0.142	0.967	0.448				0.164	0.107	0.702	0.053	0.653
0.13	0.8	0.152	0.816	0.193	0.966	0.142	0.97	0.448				0.163	0.107	0.702	0.053	0.654
0.13	0.8	0.152	0.816	0.194	0.966	0.143	0.97	0.45				0.162	0.107	0.703	0.053	0.654
0.131	0.801	0.153	0.817	0.194	0.966	0.143	0.97	0.451				0.161	0.107	0.703	0.053	0.655
0.131	0.801	0.153	0.817	0.194	0.966	0.143	0.97	0.453				0.16	0.107	0.704	0.053	0.655
0.132	0.802	0.154	0.819	0.195	0.967	0.144	0.97	0.454				0.159	0.107	0.704	0.053	0.655
0.133	0.802	0.155	0.819	0.196	0.968	0.144	0.971	0.454				0.158	0.108	0.704	0.054	0.656
0.134	0.802	0.157	0.819	0.197	0.968	0.145	0.971	0.455				0.157	0.108	0.704	0.054	0.656
0.134	0.802	0.157	0.819	0.198	0.968	0.146	0.971	0.457				0.156	0.108	0.705	0.054	0.656
0.134	0.802	0.157	0.819	0.198	0.968	0.147	0.971	0.458				0.155	0.108	0.705	0.055	0.657
0.134	0.802	0.157	0.819	0.199	0.969	0.147	0.971	0.458				0.154	0.109	0.705	0.055	0.657
0.136	0.802	0.159	0.819	0.199	0.969	0.147	0.971	0.458				0.153	0.109	0.706	0.055	0.658
0.137	0.802	0.16	0.819	0.201	0.969	0.148	0.971	0.461				0.152	0.109	0.707	0.055	0.658
0.137	0.803	0.16	0.819	0.202	0.969	0.149	0.971	0.462				0.151	0.109	0.707	0.055	0.659
0.138	0.803	0.162	0.819	0.202	0.969	0.15	0.971	0.463				0.15	0.11	0.707	0.056	0.659
0.138	0.803	0.163	0.819	0.205	0.969	0.153	0.971	0.464				0.149	0.11	0.708	0.056	0.66
0.138	0.803	0.163	0.819	0.205	0.97	0.153	0.971	0.465				0.148	0.11	0.708	0.056	0.66
0.138	0.804	0.163	0.82	0.207	0.97	0.154	0.971	0.465				0.147	0.111	0.709	0.056	0.661
0.138	0.804	0.163	0.82	0.209	0.97	0.154	0.971	0.466				0.146	0.111	0.71	0.056	0.662
0.14	0.804	0.164	0.82	0.209	0.97	0.154	0.971	0.466				0.145	0.111	0.71	0.056	0.663
0.14	0.804	0.164	0.82	0.21	0.971	0.155	0.972	0.466				0.144	0.111	0.711	0.057	0.663
0.141	0.805	0.164	0.82	0.211	0.971	0.156	0.972	0.466				0.143	0.112	0.712	0.057	0.664
0.141	0.806	0.164	0.821	0.214	0.971	0.159	0.972	0.468				0.142	0.112	0.713	0.057	0.665
0.141	0.806	0.164	0.821	0.214	0.972	0.159	0.972	0.469				0.141	0.112	0.713	0.057	0.665
0.142	0.806	0.166	0.822	0.218	0.973	0.162	0.972	0.469				0.14	0.112	0.713	0.057	0.666
0.142	0.806	0.166	0.822	0.22	0.973	0.164	0.972	0.47				0.139	0.112	0.714	0.058	0.666
0.142	0.807	0.166	0.823	0.222	0.973	0.165	0.972	0.471				0.138	0.112	0.714	0.058	0.667
0.145	0.809	0.168	0.825	0.222	0.973	0.166	0.972	0.474				0.137	0.112	0.714	0.058	0.667
0.145	0.809	0.168	0.825	0.222	0.973	0.166	0.972	0.475				0.136	0.113	0.715	0.058	0.668
0.146	0.809	0.169	0.825	0.223	0.974	0.167	0.972	0.476				0.135	0.113	0.715	0.058	0.668
0.146	0.809	0.17	0.825	0.224	0.974	0.168	0.972	0.478				0.134	0.113	0.716	0.058	0.668
0.147	0.81	0.171	0.826	0.224	0.974	0.168	0.973	0.479				0.133	0.113	0.716	0.058	0.669
0.148	0.81	0.173	0.827	0.225	0.974	0.169	0.973	0.48				0.132	0.114	0.716	0.058	0.669
0.149	0.811	0.174	0.829	0.227	0.974	0.17	0.973	0.48				0.131	0.114	0.716	0.059	0.669
0.15	0.811	0.174	0.829	0.228	0.974	0.171	0.973	0.481				0.13	0.115	0.716	0.059	0.669
0.15	0.811	0.175	0.829	0.23	0.975	0.173	0.975	0.482				0.129	0.115	0.717	0.059	0.67
0.15	0.811	0.175	0.829	0.232	0.975	0.174	0.975	0.484				0.128	0.115	0.717	0.059	0.67
0.153	0.811	0.178	0.829	0.234	0.975	0.176	0.975	0.484				0.127	0.115	0.718	0.059	0.671
0.154	0.812	0.179	0.83	0.236	0.975	0.178	0.975	0.485				0.126	0.115	0.718	0.06	0.671
0.154	0.814	0.179	0.832	0.238	0.975	0.178	0.975	0.486				0.125	0.116	0.718	0.06	0.672
0.155	0.814	0.181	0.833	0.238	0.975	0.178	0.975	0.488				0.124	0.116	0.718	0.06	0.672
0.155	0.814	0.181	0.833	0.238	0.975	0.178	0.975	0.491				0.123	0.117	0.719	0.06	0.672
0.156	0.814	0.183	0.833	0.239	0.975	0.179	0.975	0.493				0.122	0.117	0.72	0.06	0.673
0.156	0.814	0.183	0.833	0.241	0.975	0.18	0.975	0.494				0.121	0.117	0.72	0.06	0.674
0.158	0.814	0.185	0.833	0.242	0.975	0.18	0.975	0.494				0.12	0.117	0.721	0.06	0.675
0.158	0.816	0.185	0.834	0.243	0.975	0.181	0.975	0.496				0.119	0.117	0.722	0.061	0.676
0.158	0.817	0.186	0.835	0.244	0.976	0.183	0.976	0.496				0.118	0.118	0.722	0.061	0.676
0.16	0.818	0.187	0.835	0.244	0.976	0.183	0.976	0.498				0.117	0.118	0.722	0.061	0.677
0.162	0.818	0.189	0.835	0.244	0.976	0.183	0.976	0.498				0.116	0.119	0.723	0.061	0.677
0.162	0.818	0.189	0.835	0.245	0.976	0.184	0.976	0.498				0.115	0.119	0.723	0.061	0.677
0.165	0.82	0.191	0.837	0.249	0.976	0.186	0.976	0.498				0.114	0.119	0.723	0.062	0.677
0.166	0.82	0.192	0.837	0.251	0.976	0.188	0.976	0.498				0.113	0.119	0.724	0.062	0.678
0.166	0.82	0.192	0.837	0.251	0.977	0.188	0.977	0.498				0.112	0.12	0.724	0.062	0.678
0.166	0.821	0.192	0.837	0.254	0.977	0.188	0.977	0.498				0.111	0.121	0.724	0.063	0.679
0.166	0.822	0.194	0.838	0.254	0.977	0.189	0.977	0.498				0.11	0.121	0.725	0.063	0.68
0.169	0.822	0.197	0.838	0.254	0.978	0.189	0.977	0.498				0.109	0.121	0.726	0.063	0.681
0.169	0.822	0.197	0.838	0.255	0.978	0.19	0.977	0.498				0.108	0.122	0.726	0.063	0.681
0.17	0.823	0.197	0.84	0.255	0.978	0.19	0.977	0.499				0.107	0.122	0.727	0.064	0.681
0.17	0.824	0.198	0.841	0.255	0.978	0.19	0.977	0.5				0.106	0.122	0.727	0.064	0.682
0.172	0.825	0.199	0.841	0.259	0.978	0.196	0.977	0.501				0.105	0.123	0.728	0.064	0.683
0.173	0.826	0.2	0.842	0.261	0.979	0.196	0.977	0.502				0.104	0.123	0.728	0.064	0.683
0.174	0.827	0.201	0.844	0.264	0.979	0.197	0.977	0.503				0.103	0.123	0.729	0.065	0.684
0.174	0.828	0.201	0.844	0.264	0.98	0.197	0.977	0.504				0.102	0.124	0.73	0.065	0.685
0.175	0.83	0.202	0.845	0.268	0.98	0.2	0.977	0.505					0.124	0.73	0.065	0.685
0.178	0.83	0.205	0.845	0.27	0.98	0.201	0.977	0.506					0.124	0.731	0.065	0.686
0.179	0.83	0.206	0.845	0.273	0.98	0.205	0.977	0.506					0.125	0.731	0.066	0.687
0.18	0.83	0.206	0.845	0.274	0.981	0.206	0.977	0.506					0.126	0.732	0.066	0.687
0.18	0.83	0.206	0.845	0.278	0.982	0.209	0.977	0.506					0.126	0.732	0.067	0.687
0.181	0.83	0.207	0.845	0.28	0.982	0.211	0.977	0.508					0.127	0.733	0.067	0.688
0.181	0.83	0.207	0.845	0.283	0.982	0.215	0.977	0.509					0.127	0.734	0.067	0.689
0.184	0.83	0.208	0.845	0.285	0.982	0.216	0.977	0.51					0.127	0.734	0.067	0.689
0.186	0.83	0.211	0.845	0.286	0.984	0.218	0.979	0.51					0.127	0.735	0.068	0.69
0.187	0.832	0.212	0.845	0.29	0.984	0.221	0.979	0.51					0.128	0.735	0.068	0.69
0.189	0.833	0.213	0.845	0.293	0.984	0.226	0.979	0.511					0.128	0.736	0.068	0.691
0.19	0.834	0.215	0.845	0.294	0.984	0.226	0.979	0.511					0.128	0.737	0.068	0.693
0.19	0.835	0.215	0.847	0.297	0.985	0.227	0.98	0.514					0.129	0.738	0.068	0.694
0.19	0.836	0.215	0.848	0.299	0.986	0.229	0.981	0.514					0.13	0.739	0.069	0.695
0.194	0.836	0.217	0.848	0.302	0.986	0.231	0.981	0.514					0.13	0.74	0.069	0.696
0.197	0.837	0.219	0.848	0.304	0.986	0.232	0.981	0.516					0.13	0.741	0.07	0.697
0.197	0.838	0.219	0.85	0.307	0.986	0.236	0.981	0.517					0.131	0.742	0.07	0.698
0.198	0.838	0.219	0.851	0.312	0.986	0.24	0.981	0.518					0.132	0.743	0.07	0.699
0.201	0.839	0.221	0.851	0.312	0.986	0.24	0.981	0.518					0.132	0.743	0.071	0.7
0.203	0.84	0.223	0.852	0.315	0.986	0.241	0.981	0.52					0.132	0.744	0.071	0.701
0.206	0.84	0.227	0.852	0.319	0.986	0.246	0.981	0.521					0.132	0.745	0.071	0.701
0.209	0.841	0.229	0.853	0.322	0.986	0.248	0.982	0.522					0.133	0.745	0.072	0.702
0.211	0.844	0.231	0.855	0.327	0.986	0.251	0.982	0.522					0.134	0.746	0.072	0.703
0.211	0.845	0.231	0.855	0.331	0.987	0.252	0.983	0.523					0.134	0.746	0.072	0.704
0.212	0.847	0.231	0.857	0.331	0.987	0.252	0.983	0.525					0.134	0.747	0.072	0.704
0.213	0.847	0.232	0.857	0.335	0.987	0.257	0.983	0.525					0.135	0.748	0.073	0.706
0.214	0.849	0.235	0.858	0.338	0.988	0.259	0.985	0.525					0.136	0.749	0.073	0.706
0.217	0.85	0.237	0.858	0.339	0.988	0.261	0.985	0.526					0.136	0.75	0.073	0.707
0.218	0.85	0.238	0.858	0.342	0.988	0.264	0.985	0.526					0.136	0.75	0.073	0.708
0.218	0.85	0.238	0.86	0.346	0.989	0.27	0.986	0.526					0.137	0.751	0.074	0.709
0.218	0.851	0.239	0.861	0.35	0.989	0.273	0.986	0.526					0.138	0.752	0.075	0.71
0.219	0.852	0.239	0.861	0.351	0.989	0.274	0.986	0.528					0.138	0.753	0.075	0.712
0.22	0.854	0.239	0.862	0.356	0.99	0.278	0.987	0.528					0.139	0.754	0.076	0.712
0.221	0.854	0.24	0.862	0.365	0.99	0.283	0.987	0.53					0.14	0.755	0.077	0.713
0.225	0.855	0.241	0.863	0.368	0.99	0.288	0.987	0.53					0.14	0.755	0.077	0.714
0.226	0.857	0.242	0.864	0.371	0.99	0.291	0.987	0.53					0.141	0.756	0.077	0.715
0.228	0.858	0.244	0.866	0.374	0.99	0.293	0.987	0.53					0.142	0.756	0.078	0.715
0.229	0.858	0.246	0.866	0.378	0.99	0.296	0.987	0.531					0.143	0.757	0.079	0.716
0.232	0.859	0.247	0.866	0.381	0.99	0.299	0.988	0.534					0.144	0.758	0.08	0.717
0.232	0.859	0.247	0.866	0.386	0.99	0.303	0.988	0.536					0.145	0.759	0.08	0.719
0.234	0.862	0.248	0.868	0.387	0.991	0.304	0.989	0.536					0.146	0.761	0.082	0.721
0.234	0.862	0.249	0.868	0.39	0.991	0.306	0.989	0.536					0.148	0.763	0.083	0.723
0.236	0.862	0.25	0.868	0.392	0.991	0.31	0.989	0.537					0.15	0.764	0.085	0.724
0.238	0.862	0.251	0.868	0.396	0.991	0.315	0.989	0.537					0.151	0.765	0.086	0.725
0.239	0.863	0.251	0.868	0.402	0.992	0.321	0.989	0.54					0.151	0.766	0.086	0.727
0.24	0.863	0.251	0.868	0.406	0.993	0.322	0.99	0.541					0.152	0.767	0.087	0.728
0.242	0.865	0.253	0.869	0.414	0.993	0.331	0.99	0.541					0.153	0.768	0.088	0.729
0.243	0.866	0.256	0.871	0.416	0.993	0.333	0.99	0.542					0.153	0.769	0.088	0.73
0.245	0.866	0.257	0.872	0.419	0.993	0.335	0.99	0.542					0.154	0.77	0.088	0.732
0.246	0.866	0.257	0.872	0.427	0.994	0.344	0.991	0.544					0.155	0.771	0.089	0.732
0.248	0.867	0.258	0.873	0.433	0.994	0.351	0.991	0.546					0.156	0.771	0.09	0.733
0.25	0.867	0.26	0.873	0.44	0.994	0.36	0.991	0.546					0.157	0.772	0.091	0.733
0.25	0.867	0.261	0.873	0.446	0.994	0.365	0.991	0.547					0.158	0.773	0.092	0.735
0.254	0.869	0.263	0.874	0.454	0.994	0.372	0.991	0.549					0.159	0.775	0.092	0.737
0.255	0.869	0.264	0.874	0.463	0.994	0.379	0.991	0.55					0.16	0.776	0.093	0.738
0.258	0.87	0.267	0.876	0.467	0.994	0.382	0.991	0.552					0.161	0.778	0.093	0.74
0.26	0.872	0.268	0.878	0.47	0.994	0.386	0.991	0.553					0.162	0.78	0.094	0.742
0.261	0.873	0.269	0.878	0.479	0.994	0.394	0.991	0.553					0.163	0.782	0.095	0.745
0.262	0.874	0.27	0.881	0.486	0.994	0.403	0.991	0.554					0.165	0.782	0.096	0.745
0.265	0.874	0.271	0.881	0.494	0.994	0.408	0.991	0.555					0.166	0.783	0.097	0.746
0.268	0.876	0.274	0.883	0.498	0.994	0.41	0.991	0.557					0.167	0.783	0.098	0.747
0.27	0.877	0.274	0.884	0.502	0.994	0.415	0.992	0.558					0.168	0.786	0.1	0.75
0.273	0.878	0.275	0.884	0.51	0.994	0.421	0.992	0.559					0.17	0.787	0.101	0.751
0.274	0.879	0.277	0.886	0.517	0.996	0.429	0.994	0.562					0.17	0.788	0.102	0.752
0.278	0.879	0.281	0.886	0.521	0.996	0.431	0.994	0.564					0.171	0.789	0.102	0.754
0.281	0.88	0.284	0.886	0.528	0.997	0.437	0.996	0.566					0.171	0.791	0.103	0.756
0.282	0.882	0.285	0.888	0.533	0.997	0.441	0.996	0.567					0.172	0.793	0.104	0.759
0.286	0.883	0.288	0.89	0.538	0.998	0.449	0.997	0.569					0.174	0.794	0.105	0.76
0.29	0.885	0.291	0.893	0.552	0.998	0.465	0.997	0.573					0.176	0.796	0.107	0.761
0.294	0.885	0.294	0.893	0.562	0.998	0.476	0.997	0.574					0.178	0.797	0.109	0.763
0.295	0.889	0.295	0.897	0.566	0.998	0.48	0.997	0.577					0.179	0.799	0.11	0.765
0.296	0.889	0.296	0.897	0.571	0.998	0.487	0.997	0.579					0.18	0.8	0.111	0.766
0.297	0.89	0.296	0.898	0.579	0.998	0.493	0.997	0.583					0.183	0.802	0.113	0.768
0.299	0.892	0.299	0.898	0.59	0.999	0.503	0.999	0.587					0.185	0.803	0.115	0.77
0.301	0.893	0.3	0.899	0.602	0.999	0.515	0.999	0.59					0.188	0.804	0.117	0.771
0.304	0.897	0.301	0.903	0.618	0.999	0.533	0.999	0.592					0.191	0.805	0.12	0.773
0.309	0.898	0.305	0.905	0.627	0.999	0.543	0.999	0.594					0.192	0.806	0.121	0.774
0.312	0.899	0.308	0.905	0.634	0.999	0.552	0.999	0.596					0.195	0.808	0.124	0.775
0.315	0.9	0.309	0.905	0.641	0.999	0.559	0.999	0.598					0.198	0.809	0.126	0.777
0.319	0.901	0.312	0.906	0.651	0.999	0.567	0.999	0.605					0.2	0.811	0.128	0.779
0.323	0.901	0.315	0.906	0.661	0.999	0.58	0.999	0.608					0.204	0.813	0.131	0.782
0.326	0.902	0.317	0.907	0.672	0.999	0.592	0.999	0.61					0.206	0.816	0.133	0.785
0.33	0.903	0.323	0.909	0.684	0.999	0.604	0.999	0.614					0.21	0.817	0.136	0.787
0.336	0.903	0.325	0.909	0.697	0.999	0.621	0.999	0.617					0.213	0.82	0.139	0.79
0.341	0.906	0.33	0.912	0.711	1	0.636	1	0.623					0.216	0.822	0.143	0.792
0.348	0.907	0.337	0.914	0.723	1	0.648	1	0.627					0.22	0.825	0.147	0.795
0.356	0.908	0.345	0.915	0.738	1	0.665	1	0.631					0.224	0.827	0.15	0.797
0.362	0.908	0.35	0.915	0.753	1	0.681	1	0.636					0.227	0.83	0.154	0.801
0.366	0.912	0.352	0.917	0.766	1	0.698	1	0.64					0.231	0.832	0.157	0.804
0.371	0.912	0.357	0.917	0.779	1	0.717	1	0.646					0.235	0.836	0.161	0.808
0.376	0.914	0.362	0.919	0.794	1	0.735	1	0.654					0.24	0.839	0.167	0.812
0.383	0.918	0.368	0.925	0.807	1	0.752	1	0.66					0.246	0.841	0.173	0.815
0.394	0.92	0.379	0.927	0.822	1	0.772	1	0.664					0.252	0.845	0.179	0.819
0.4	0.924	0.386	0.929	0.834	1	0.789	1	0.673					0.26	0.849	0.186	0.823
0.413	0.928	0.4	0.931	0.861	1	0.82	1	0.68					0.269	0.853	0.195	0.828
0.422	0.931	0.407	0.934	0.875	1	0.837	1	0.693					0.281	0.858	0.207	0.834
0.435	0.934	0.424	0.937	0.897	1	0.865	1	0.703					0.294	0.862	0.221	0.838
0.455	0.936	0.438	0.937	0.91	1	0.883	1	0.717					0.31	0.867	0.236	0.844
0.482	0.942	0.467	0.945	0.934	1	0.914	1	0.733					0.334	0.874	0.26	0.852
0.495	0.942	0.48	0.945	0.939	1	0.92	1	0.739					0.364	0.882	0.292	0.861
0.495	0.942	0.48	0.945	0.939	1	0.92	1	0.739					0.422	0.893	0.354	0.874
