# Supplementary material for: Discovering cis-Regulatory RNAs in Shewanella Genomes by Support Vector Machines
Source: PubMed Central journal article supplement (PMC2659441; doi:10.1371/journal.pcbi.1000338), 2009-04-03
Supplement: pcbi.1000338.s003.pdf [file pcbi.1000338.s003.pdf]

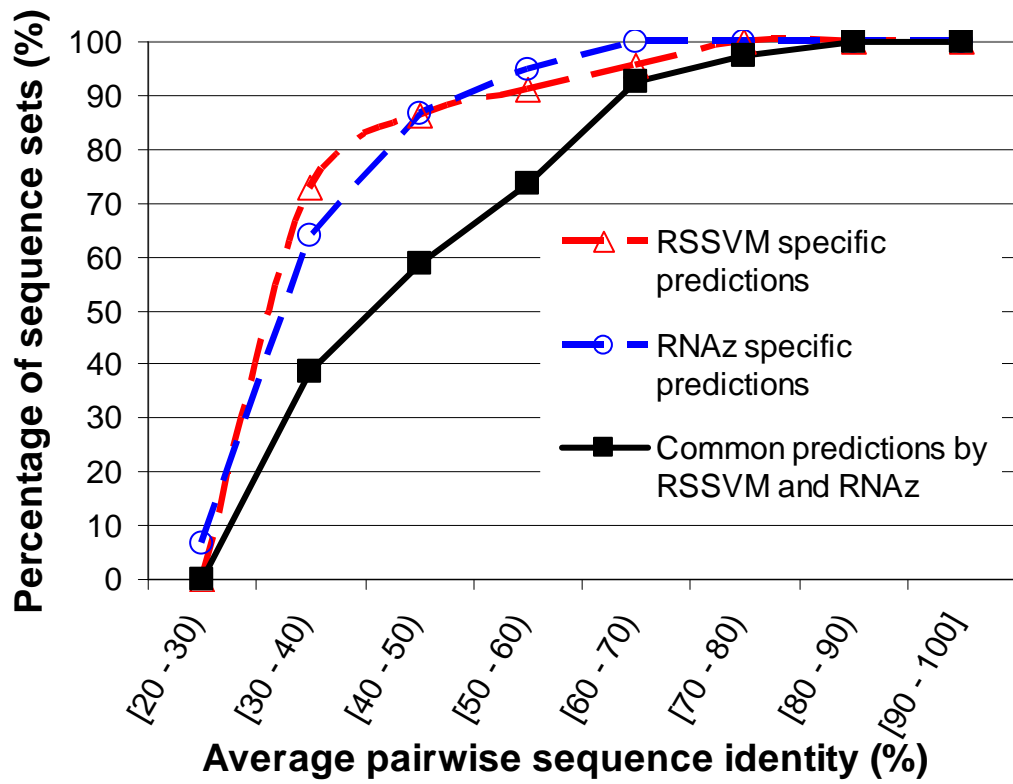

**Figure S1.** Cumulative distribution of sequence identities of the sequence sets with predicted regulatory RNAs by RSSVM and/or RNAz.
