# Supplementary material for: Discovering cis-Regulatory RNAs in Shewanella Genomes by Support Vector Machines
Source: PubMed Central journal article supplement (PMC2659441; doi:10.1371/journal.pcbi.1000338), 2009-04-03
Supplement: pcbi.1000338.s004.pdf [file pcbi.1000338.s004.pdf]

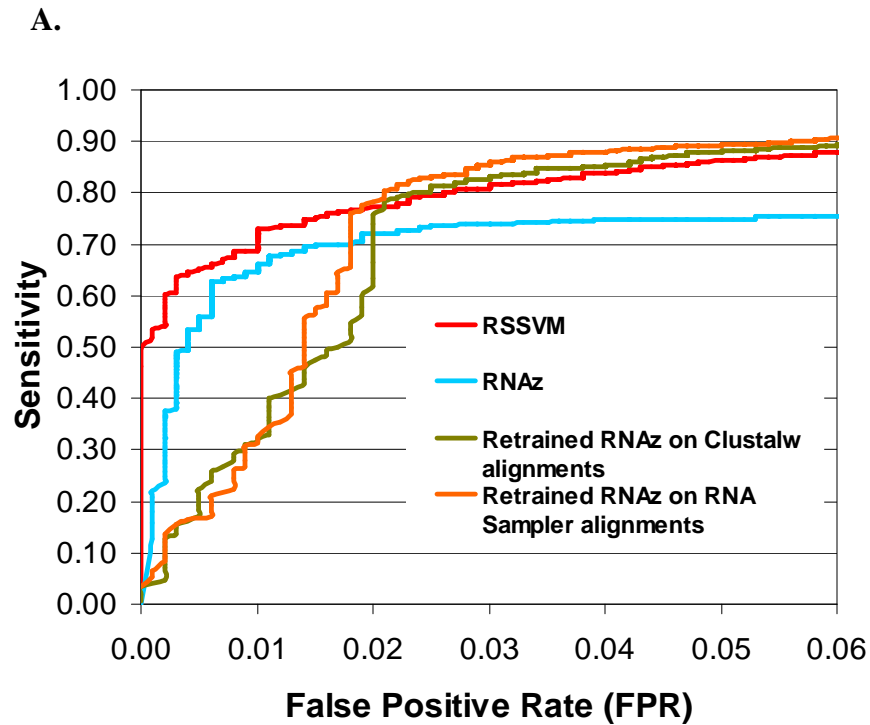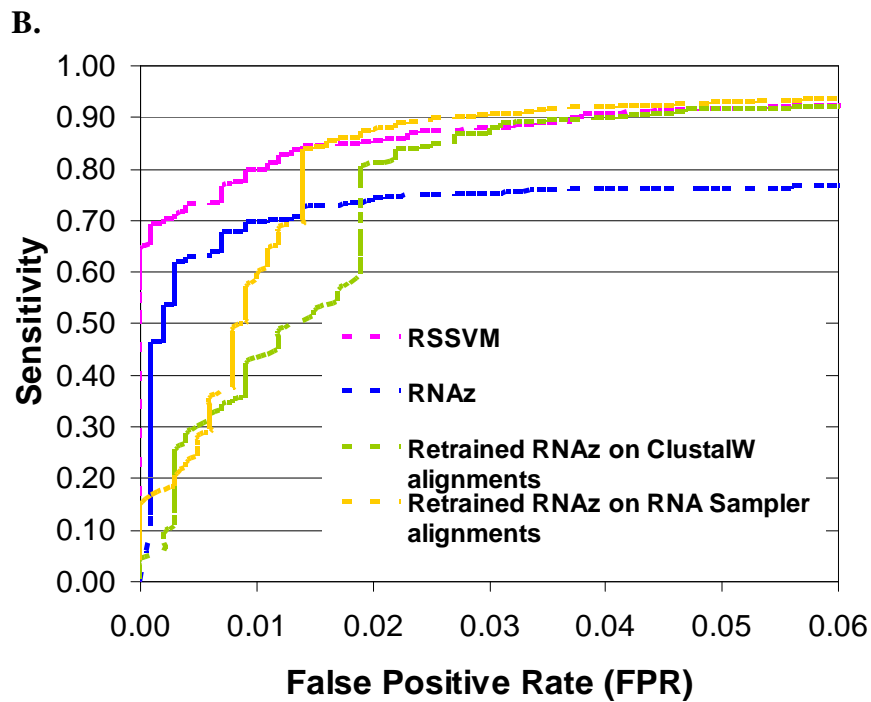

**Figure S2.** The Receiver Operating Characteristic (ROC) curves of RSSVM, RNAz, retrained RNAz on ClustalW alignments, and retrained RNAz on RNA Sampler alignments. A. on all test sets. B on test sets with sequence identities lower than 70%. We retrained RNAz using the same training sets for RSSVM.
