# Supplementary material for: Discovering cis-Regulatory RNAs in Shewanella Genomes by Support Vector Machines
Source: PubMed Central journal article supplement (PMC2659441; doi:10.1371/journal.pcbi.1000338), 2009-04-03
Supplement: pcbi.1000338.s006.pdf [file pcbi.1000338.s006.pdf]

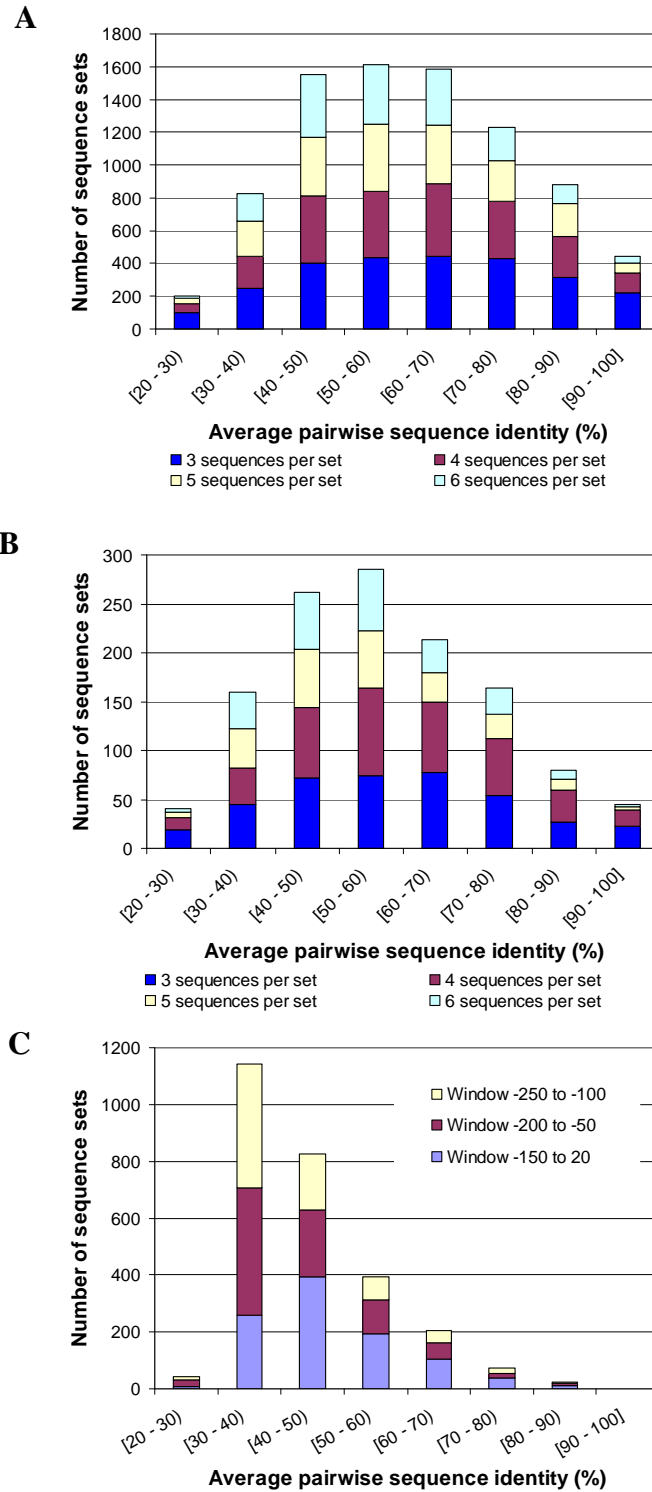

**Figure S4.** Distribution of sequence identities and size of the sequence sets studied. A. Training sets. B. Test sets. C. *Shewanella* sequence sets.
