# Supplementary material for: Discovering cis-Regulatory RNAs in Shewanella Genomes by Support Vector Machines
Source: PubMed Central journal article supplement (PMC2659441; doi:10.1371/journal.pcbi.1000338), 2009-04-03
Supplement: pcbi.1000338.s009.pdf [file pcbi.1000338.s009.pdf]

**Table S2.** Top 166 predicted regulatory RNAs by RSSVM.

| Rank | GI              | RSSVM | RNAz  | QRNA               | Terminator (T)<br>Attenuator (A) | Gene<br>Name | Gene Product                                               | Knowledge of<br>Regulation                   | Reference                       |
|------|-----------------|-------|-------|--------------------|----------------------------------|--------------|------------------------------------------------------------|----------------------------------------------|---------------------------------|
| 1    | <b>24349136</b> | 1.000 | 1.000 | Q(FP) <sup>a</sup> | T A                              | trpE         | anthranilate synthase component I                          | RF00513 Trp_leader                           | Rfam                            |
| 2    | <b>24345897</b> | 1.000 | 1.000 | Q                  | T A                              | rsd          | regulator of sigma D                                       | Leader peptide, and transcription attenuator | (Vitreschak <i>et al.</i> 2004) |
| 3    | <b>24346870</b> | 1.000 | 1.000 | Q(FP)              | T A                              | SO1202       | conserved hypothetical protein                             | RF00005 tRNA                                 | Rfam                            |
| 4    | <b>24351250</b> | 1.000 | 0.998 | Q(FP)              | T A                              | SO4727       | conserved hypothetical protein                             | RF00558 L20_leader                           | Rfam                            |
| 5    | <b>24350784</b> | 1.000 | 0.998 | Q                  | T -                              | ilvG         | acetolactate synthase II, large subunit                    |                                              |                                 |
| 6    | <b>24347627</b> | 1.000 | 0.998 |                    | T A                              | ppiD         | peptidyl-prolyl cis-trans isomerase D                      | RF00506 Thr_leader                           | Rfam                            |
| 7    | <b>24349634</b> | 1.000 | 0.997 | Q                  | T A                              | thrA         | aspartokinase/threonine dehydrogenase, threonine-sensitive | RF00506 Thr_leader                           | Rfam                            |
| 8    | <b>24347975</b> | 1.000 | 0.997 | Q(FP)              | T A                              | hisG         | ATP phosphoribosyltransferase                              | RF00514 His_leader                           | Rfam                            |
| 9    | <b>24349200</b> | 1.000 | 0.996 | Q                  | T A                              | SO3069       | conserved hypothetical protein                             |                                              |                                 |
| 10   | <b>24349922</b> | 1.000 | 0.992 | Q                  | T A                              | SO3649       | GTP-binding protein, GTP1/Obg family                       |                                              |                                 |
| 11   | <b>24347698</b> | 1.000 | 0.988 | Q                  | T A                              | rmf          | ribosome modulation factor                                 |                                              |                                 |
| 12   | <b>24351271</b> | 1.000 | 0.916 |                    | T A                              | SO4742       | transcriptional regulator, DeoR family                     |                                              |                                 |
| 13   | <b>24346855</b> | 1.000 | 0.643 |                    | T A                              | greA         | transcription elongation factor GreA                       |                                              |                                 |
| 14   | <b>24348820</b> | 1.000 | 0.634 |                    | T A                              | SO2744       | helicase                                                   |                                              |                                 |
| 15   | <b>24348163</b> | 1.000 | 0.542 |                    | T A                              | SO2223       | peptidase, putative                                        |                                              |                                 |
| 16   | <b>24347418</b> | 1.000 | 0.523 |                    |                                  | rpsB         | ribosomal protein S2                                       | RF00127 t44 RNA                              | Rfam                            |
| 17   | <b>24346570</b> | 1.000 | 0.507 |                    | T A                              | ldhA         | D-lactate dehydrogenase                                    | Possible post-transcriptional effect         | (Jiang <i>et al.</i> 2001)      |
| 18   | <b>24346427</b> | 1.000 | 0.409 |                    | T A                              | SO0858       | sodium:alanine symporter family protein                    |                                              |                                 |

**Table S2.** Top 166 predicted regulatory RNAs by RSSVM (continued 1).

| Rank | GI              | RSSVM | RNAz  | QRNA | Terminator (T)<br>Attenuator (A) | Gene<br>Name | Gene Product                                                                 | Knowledge of<br>Regulation                   | Reference                       |
|------|-----------------|-------|-------|------|----------------------------------|--------------|------------------------------------------------------------------------------|----------------------------------------------|---------------------------------|
| 19   | <b>24346216</b> | 1.000 | 0.319 |      | T A                              | SO0695       | glutathione-regulated potassium-efflux system protein KefC, putative         |                                              |                                 |
| 20   | <b>24348228</b> | 1.000 | 0.272 |      | T A                              | ndk          | nucleoside diphosphate kinase                                                |                                              |                                 |
| 21   | <b>24349359</b> | 1.000 | 0.223 |      |                                  | SO3191       | chain length determinant protein                                             |                                              |                                 |
| 22   | <b>24348648</b> | 1.000 | 0.150 |      |                                  | SO2602       | conserved hypothetical protein                                               |                                              |                                 |
| 23   | <b>24348431</b> | 1.000 | 0.105 |      | T -                              | aspS         | aspartyl-tRNA synthetase                                                     | tRNA synthetase leader                       |                                 |
| 24   | <b>24350063</b> | 1.000 | 0.996 | Q    |                                  | SO3769       | conserved hypothetical protein                                               |                                              |                                 |
| 25   | <b>24348233</b> | 1.000 | 0.904 |      |                                  | ilvI         | acetolactate synthase III, large subunit                                     | Leader peptide, and transcription attenuator | (Vitreschak <i>et al.</i> 2004) |
| 26   | <b>24349427</b> | 1.000 | 0.862 |      |                                  | flgB         | flagellar basal-body rod protein FlgB                                        | Putative GEMM element                        | (Weinberg <i>et al.</i> 2007)   |
| 27   | <b>24348700</b> | 1.000 | 0.241 |      |                                  | aroH         | phospho-2-dehydro-3-deoxyheptonate aldolase, trp-sensitive                   | Possible transcription termination           | (Zurawski <i>et al.</i> 1981)   |
| 28   | <b>24346058</b> | 1.000 | 0.037 |      | T A                              | plsC         | 1-acyl-sn-glycerol-3-phosphate acyltransferase                               | Leader peptide, and transcription attenuator | (Vitreschak <i>et al.</i> 2004) |
| 29   | <b>24345795</b> | 1.000 | 0.850 | Q    | T -                              | SO0354       | sodium/calcium exchanger                                                     |                                              |                                 |
| 30   | <b>24345909</b> | 1.000 | 0.999 |      |                                  | purH         | phosphoribosylaminoimidazolecarboxamide formyltransferase/IMP cyclohydrolase |                                              |                                 |
| 31   | <b>24347794</b> | 1.000 | 1.000 | Q    | T A                              | sucA         | 2-oxoglutarate dehydrogenase, E1 component                                   |                                              |                                 |
| 32   | <b>24349814</b> | 1.000 | 0.570 |      | T -                              | gshA         | glutamate--cysteine ligase                                                   |                                              |                                 |
| 33   | <b>24349842</b> | 1.000 | 0.974 | Q    |                                  | SO3582       | methyl-accepting chemotaxis protein                                          |                                              |                                 |
| 34   | <b>24346699</b> | 1.000 | 1.000 | Q    |                                  | SO1071       | conserved hypothetical protein                                               | RF00080 yybP-ykoY                            | Rfam                            |
| 35   | <b>24350656</b> | 1.000 | 0.998 | Q    | T A                              | leuA         | 2-isopropylmalate synthase                                                   | Leader peptide, and transcription attenuator | (Vitreschak <i>et al.</i> 2004) |

**Table S2.** Top 166 predicted regulatory RNAs by RSSVM (continued 2).

| Rank | GI              | RSSVM | RNAz  | QRNA | Terminator (T)<br>Attenuator (A) | Gene<br>Name | Gene Product                                  | Knowledge of<br>Regulation                    | Reference                          |
|------|-----------------|-------|-------|------|----------------------------------|--------------|-----------------------------------------------|-----------------------------------------------|------------------------------------|
| 36   | <b>24348336</b> | 1.000 | 0.235 |      |                                  | ccoN         | cytochrome c oxidase, cbb3-type, subunit I    |                                               |                                    |
| 37   | <b>24347061</b> | 1.000 | 0.990 | Q    | T A                              | lepB         | signal peptidase I                            |                                               |                                    |
| 38   | <b>24349573</b> | 1.000 | 0.455 |      |                                  | SO3364       | conserved hypothetical protein                |                                               |                                    |
| 39   | <b>24347085</b> | 1.000 | 0.997 | Q    | T A                              | pheA         | chorismate mutase/prephenate dehydratase      | RF00513 Trp_leader                            | Rfam                               |
| 40   | <b>24349420</b> | 1.000 | 0.868 | Q    |                                  | flgF         | flagellar basal-body rod protein FlgF         |                                               |                                    |
| 41   | <b>24345882</b> | 1.000 | 0.094 |      |                                  | pdhR         | pyruvate dehydrogenase complex repressor      | PdhR-box in <i>E. coli</i>                    | (Ogasawara <i>et al.</i> 2007)     |
| 42   | <b>24350809</b> | 1.000 | 0.454 |      |                                  | SO4366       | conserved hypothetical protein                |                                               |                                    |
| 43   | <b>24349259</b> | 1.000 | 0.914 | Q    | T A                              | tgt          | queuine tRNA-ribosyltransferase               |                                               |                                    |
| 44   | <b>24348337</b> | 1.000 | 0.939 |      |                                  | SO2365       | conserved hypothetical protein                |                                               |                                    |
| 45   | <b>24349640</b> | 1.000 | 0.750 |      | T A                              | SO3418       | hypothetical protein                          |                                               |                                    |
| 46   | <b>24347081</b> | 1.000 | 0.095 |      | T A                              | hcp          | prismane protein                              |                                               |                                    |
| 47   | <b>24350912</b> | 1.000 | 0.995 |      |                                  | moaA         | molybdenum cofactor biosynthesis protein A    |                                               |                                    |
| 48   | <b>24345525</b> | 1.000 | 0.407 |      |                                  | ribB         | 3,4-dihydroxy-2-butanone 4-phosphate synthase |                                               |                                    |
| 49   | <b>24345845</b> | 1.000 | 0.864 |      |                                  | SO0394       | conserved hypothetical protein                |                                               |                                    |
| 50   | <b>24348221</b> | 1.000 | 0.940 |      | T -                              | rimK-2       | ribosomal protein S6 modification protein     |                                               |                                    |
| 51   | <b>24345862</b> | 1.000 | 0.997 | Q    |                                  | rho          | transcription termination factor Rho          |                                               |                                    |
| 52   | <b>24348056</b> | 1.000 | 0.893 |      | T -                              | adhE         | aldehyde-alcohol dehydrogenase                | Stem-loop for occupying RBS in <i>E. coli</i> | (Membrillo-Hernandez and Lin 1999) |
| 53   | <b>24351269</b> | 1.000 | 0.018 |      | T A                              | SO4740       | conserved hypothetical protein                |                                               |                                    |
| 54   | <b>24348439</b> | 1.000 | 0.390 |      | - A                              | SO2438       | transcriptional regulator, LysR family        |                                               |                                    |

**Table S2.** Top 166 predicted regulatory RNAs by RSSVM (continued 3).

| Rank | GI       | RSSVM | RNAz  | QRNA | Terminator (T)<br>Attenuator (A) | Gene<br>Name | Gene Product                                      | Knowledge of<br>Regulation | Reference                   |
|------|----------|-------|-------|------|----------------------------------|--------------|---------------------------------------------------|----------------------------|-----------------------------|
| 55   | 24346560 | 1.000 | 0.196 |      |                                  | ahpC         | alkyl hydroperoxide reductase, C subunit          |                            |                             |
| 56   | 24349996 | 1.000 | 0.459 |      | T -                              | SO3711       | conserved hypothetical protein                    |                            |                             |
| 57   | 24345468 | 1.000 | 0.476 |      |                                  | hutI         | imidazolonepropionase                             |                            |                             |
| 58   | 24349731 | 1.000 | 0.571 |      |                                  | mexE         | RND multidrug efflux membrane fusion protein MexE |                            |                             |
| 59   | 24349583 | 1.000 | 0.361 |      |                                  | SO3371       | conserved hypothetical protein                    |                            |                             |
| 60   | 24349939 | 1.000 | 0.397 |      |                                  | fadD-2       | long-chain-fatty-acid--CoA ligase                 |                            |                             |
| 61   | 24347619 | 1.000 | 0.947 |      | T -                              | tig          | trigger factor                                    |                            |                             |
| 62   | 24345537 | 1.000 | 0.465 |      |                                  | SO0150       | lipoprotein, putative                             |                            |                             |
| 63   | 24347612 | 1.000 | 0.012 | Q    | T A                              | glnS         | glutaminyl-tRNA synthetase                        | tRNA synthetase leader     | (Cheung <i>et al.</i> 1985) |
| 64   | 24346616 | 1.000 | 1.000 | Q    |                                  | SO1007       | conserved hypothetical protein                    | RF00168 Lysine             | Rfam                        |
| 65   | 24347626 | 0.999 | 1.000 | Q    |                                  | SO1797       | DNA-binding protein, HU family                    |                            |                             |
| 66   | 24347658 | 0.999 | 0.988 | Q    |                                  | SO1824       | conserved hypothetical protein                    |                            |                             |
| 67   | 24349607 | 0.999 | 0.997 | Q    |                                  | SO3392       | oxidoreductase, FMN-binding                       |                            |                             |
| 68   | 24348243 | 0.999 | 0.424 |      |                                  | SO2286       | sulfate permease family protein                   |                            |                             |
| 69   | 24350411 | 0.999 | 0.435 |      |                                  | SO4048       | cytochrome c family protein                       |                            |                             |
| 70   | 24349974 | 0.999 | 0.530 |      |                                  | SO3694       | conserved hypothetical protein                    |                            |                             |
| 71   | 24350483 | 0.999 | 0.918 |      | T A                              | mshC         | MSHA pilin protein MshC                           |                            |                             |
| 72   | 24350423 | 0.999 | 0.997 |      |                                  | metJ         | met repressor                                     |                            |                             |
| 73   | 24348868 | 0.999 | 0.240 | Q    | T A                              | rne          | ribonuclease E                                    | RF00370 sroD RNA           | Rfam                        |
| 74   | 24348465 | 0.999 | 0.641 | Q    | T A                              | SO2458       | transporter, putative                             |                            |                             |
| 75   | 24347241 | 0.999 | 0.419 |      |                                  | SO1489       | hypothetical protein                              |                            |                             |
| 76   | 24346750 | 0.999 | 0.000 |      | - A                              | bfr2         | bacterioferritin subunit 2                        |                            |                             |
| 77   | 24345794 | 0.999 | 0.535 |      | T -                              | SO0353       | TPR domain protein                                |                            |                             |
| 78   | 24345538 | 0.999 | 0.526 |      | T A                              | SO0151       | conserved hypothetical protein                    |                            |                             |
| 79   | 24346342 | 0.999 | 0.417 |      |                                  | SO0793       | hypothetical protein                              |                            |                             |
| 80   | 24347038 | 0.999 | 0.810 | Q    |                                  | SO1331       | MutT/nudix family protein                         |                            |                             |
| 81   | 24348153 | 0.999 | 0.669 |      |                                  | SO2216       | sensory box protein                               |                            |                             |

**Table S2.** Top 166 predicted regulatory RNAs by RSSVM (continued 4).

| Rank | GI              | RSSVM | RNAz  | QRNA  | Terminator (T)<br>Attenuator (A) | Gene<br>Name | Gene Product                                                     | Knowledge of<br>Regulation                                                        | Reference                                               |
|------|-----------------|-------|-------|-------|----------------------------------|--------------|------------------------------------------------------------------|-----------------------------------------------------------------------------------|---------------------------------------------------------|
| 82   | <b>24348420</b> | 0.999 | 0.094 |       |                                  | SO2427       | TonB-dependent receptor,<br>putative                             |                                                                                   |                                                         |
| 83   | <b>24347590</b> | 0.998 | 0.451 |       | T A                              | SO1769       | glutamate decarboxylase,<br>putative                             | Possible post-<br>transcriptional<br>regulation in <i>S.</i><br><i>oneidensis</i> | (Yang <i>et al.</i> 2008)                               |
| 84   | <b>24348152</b> | 0.998 | 0.474 |       | T A                              | SO2215       | sun protein, putative                                            |                                                                                   |                                                         |
| 85   | <b>24347329</b> | 0.998 | 0.288 | Q     | T A                              | SO1560       | phosphate-binding protein                                        |                                                                                   |                                                         |
| 86   | <b>24349540</b> | 0.998 | 0.435 |       | T A                              | SO3337       | conserved domain protein                                         |                                                                                   |                                                         |
| 87   | <b>24349811</b> | 0.998 | 0.697 |       | T -                              | SO3556       | cyclic nucleotide<br>phosphodiesterase, putative                 |                                                                                   |                                                         |
| 88   | <b>24345631</b> | 0.998 | 0.999 | Q(FP) | T -                              | rpoB         | DNA-directed RNA polymerase,<br>beta subunit                     | Transcriptional<br>attenuation                                                    | (Ishihama and Fukuda<br>1980; Steward and<br>Linn 1992) |
| 89   | <b>24350422</b> | 0.998 | 0.100 | Q     |                                  | metB         | cystathionine gamma-synthase                                     |                                                                                   |                                                         |
| 90   | <b>24349961</b> | 0.998 | 0.424 | Q     |                                  | SO3683       | coniferyl aldehyde<br>dehydrogenase                              | Ribosomal protein<br>leader                                                       | Rfam                                                    |
| 91   | <b>24345625</b> | 0.998 | 1.000 |       |                                  | rplJ         | ribosomal protein L10                                            |                                                                                   |                                                         |
| 92   | <b>24350610</b> | 0.997 | 0.259 |       |                                  | ubiE         | ubiquinone/menaquinone<br>biosynthesis methlytransferase<br>UbiE |                                                                                   |                                                         |
| 93   | <b>24346037</b> | 0.997 | 0.678 |       |                                  | SO0547       | conserved hypothetical protein                                   | RF00522 PreQ1                                                                     | Rfam                                                    |
| 94   | <b>24350762</b> | 0.997 | 0.317 |       |                                  | SO4329       | conserved hypothetical protein                                   |                                                                                   |                                                         |
| 95   | <b>24347883</b> | 0.996 | 0.396 |       |                                  | ushA         | 5'-nucleotidase                                                  |                                                                                   |                                                         |
| 96   | <b>24349570</b> | 0.996 | 0.418 |       |                                  | SO3361       | conserved hypothetical protein                                   |                                                                                   |                                                         |
| 97   | <b>24348938</b> | 0.996 | 0.545 |       |                                  | SO2846       | conserved hypothetical protein                                   |                                                                                   |                                                         |
| 98   | <b>24349291</b> | 0.996 | 0.345 |       |                                  | SO3140       | thymidine kinase                                                 |                                                                                   |                                                         |
| 99   | <b>24347300</b> | 0.995 | 0.103 |       |                                  | SO1538       | isocitrate dehydrogenase, NAD-<br>dependent                      |                                                                                   |                                                         |
| 100  | <b>24348781</b> | 0.995 | 0.986 |       | - A                              | SO2715       | TonB-dependent receptor                                          | RF00059 TPP                                                                       | Rfam                                                    |

**Table S2.** Top 166 predicted regulatory RNAs by RSSVM (continued 5).

| Rank | GI              | RSSVM | RNAz  | QRNA  | Terminator (T)<br>Attenuator (A) | Gene<br>Name | Gene Product                                                   | Knowledge of<br>Regulation                              | Reference                     |
|------|-----------------|-------|-------|-------|----------------------------------|--------------|----------------------------------------------------------------|---------------------------------------------------------|-------------------------------|
| 101  | <b>24348214</b> | 0.994 | 0.964 |       |                                  | SO2263       | Rrf2 family protein                                            |                                                         |                               |
| 102  | <b>24350917</b> | 0.994 | 0.439 |       |                                  | SO4454       | methyl-accepting chemotaxis protein                            |                                                         |                               |
| 103  | <b>24349041</b> | 0.994 | 0.982 | Q     |                                  | SO2935       | oxidoreductase, short-chain dehydrogenase/reductase family     |                                                         |                               |
| 104  | <b>24346274</b> | 0.994 | 0.256 |       | T A                              | SO0740       | melanin biosynthesis protein TyrA, putative                    |                                                         |                               |
| 105  | <b>24349015</b> | 0.994 | 0.274 | Q     | T -                              | pflB         | formate acetyltransferase                                      | Possible post-transcriptional regulation                | (Beliaev <i>et al.</i> 2002)  |
| 106  | <b>24350214</b> | 0.994 | 0.688 |       |                                  | SO3896       | outer membrane porin, putative                                 | Post-transcriptional regulation in <i>S. oneidensis</i> | (Maier and Myers 2004)        |
| 107  | <b>24351072</b> | 0.993 | 0.890 | Q     |                                  | rpoH         | RNA polymerase sigma-32 factor                                 |                                                         |                               |
| 108  | <b>24347836</b> | 0.993 | 0.064 |       |                                  | SO1963       | conserved hypothetical protein                                 |                                                         |                               |
| 109  | <b>24345633</b> | 0.992 | 0.988 | Q     | T A                              | rpsL         | ribosomal protein S12                                          | Ribosomal protein leader                                | (Yao <i>et al.</i> 2007)      |
| 110  | <b>24349105</b> | 0.992 | 0.359 |       |                                  | SO2990       | prophage LambdaSo, transcriptional regulator, Cro/CI family    |                                                         |                               |
| 111  | <b>24346963</b> | 0.992 | 0.599 |       |                                  | SO1274       | conserved hypothetical protein                                 |                                                         |                               |
| 112  | <b>24349403</b> | 0.990 | 0.179 |       | T -                              | fliE         | flagellar hook-basal body complex protein FliE                 | Putative GEMM element                                   | (Weinberg <i>et al.</i> 2007) |
| 113  | <b>24345796</b> | 0.990 | 0.385 |       |                                  | SO0355       | AMP-binding protein                                            |                                                         |                               |
| 114  | <b>24347791</b> | 0.990 | 0.618 |       |                                  | sdhC         | succinate dehydrogenase, cytochrome b556 subunit               |                                                         |                               |
| 115  | <b>24346525</b> | 0.989 | 0.015 |       |                                  | fba          | fructose-bisphosphate aldolase, class II, Calvin cycle subtype |                                                         |                               |
| 116  | <b>24345418</b> | 0.989 | 0.545 |       |                                  | secB         | protein-export protein SecB                                    |                                                         |                               |
| 117  | <b>24350326</b> | 0.989 | 0.765 | Q(FP) |                                  | lysC         | aspartokinase III, lysine-sensitive                            | RF00168 Lysine                                          | Rfam                          |

**Table S2.** Top 166 predicted regulatory RNAs by RSSVM (continued 6).

| Rank | GI              | RSSVM | RNAz  | QRNA  | Terminator (T)<br>Attenuator (A) | Gene<br>Name | Gene Product                                                 | Knowledge of<br>Regulation                                      | Reference              |
|------|-----------------|-------|-------|-------|----------------------------------|--------------|--------------------------------------------------------------|-----------------------------------------------------------------|------------------------|
| 118  | <b>24349226</b> | 0.989 | 0.057 | Q(FP) |                                  | SO3089       | fatty oxidation complex, beta subunit                        |                                                                 |                        |
| 119  | <b>24346986</b> | 0.989 | 0.320 |       |                                  | folB         | dihydroneopterin aldolase                                    |                                                                 |                        |
| 120  | <b>24348446</b> | 0.989 | 0.420 |       |                                  | thiC         | thiamin biosynthesis protein ThiC                            | RF00059 TPP                                                     | Rfam                   |
| 121  | <b>24348979</b> | 0.988 | 0.704 | Q     | - A                              | SO2882       | conserved hypothetical protein                               |                                                                 |                        |
| 122  | <b>24347613</b> | 0.988 | 0.267 |       |                                  | SO1787       | conserved hypothetical protein                               |                                                                 |                        |
| 123  | <b>24350786</b> | 0.988 | 0.277 | Q     |                                  | ilvC         | ketol-acid reductoisomerase                                  |                                                                 |                        |
| 124  | <b>24345621</b> | 0.987 | 0.108 |       | T -                              | secE         | preprotein translocase, SecE subunit                         | RNaseIII sites in the leader sequence of SecE in <i>E. coli</i> | (Chow and Dennis 1994) |
| 125  | <b>24347051</b> | 0.987 | 0.969 |       |                                  | nadB         | L-aspartate oxidase                                          | RF00522 PreQ1                                                   | Rfam                   |
| 126  | <b>24346706</b> | 0.987 | 0.353 | Q     | T A                              | SO1075       | conserved hypothetical protein                               |                                                                 |                        |
| 127  | <b>24349968</b> | 0.987 | 0.493 |       |                                  | SO3687       | curli production assembly/transport component CsgE, putative |                                                                 |                        |
| 128  | <b>24349655</b> | 0.986 | 0.932 | Q     |                                  | recA         | recA protein                                                 |                                                                 |                        |
| 129  | <b>24348006</b> | 0.985 | 0.006 |       |                                  | hoxK         | quinone-reactive Ni/Fe hydrogenase, small subunit precursor  |                                                                 |                        |
| 130  | <b>24348892</b> | 0.985 | 0.366 |       |                                  | SO2805       | conserved hypothetical protein                               |                                                                 |                        |
| 131  | <b>24345589</b> | 0.982 | 0.512 |       | T A                              | SO0190       | MutT/nudix family protein                                    |                                                                 |                        |
| 132  | <b>24351101</b> | 0.982 | 0.994 |       | T -                              | SO4606       | cytochrome c oxidase, subunit II                             |                                                                 |                        |
| 133  | <b>24346318</b> | 0.982 | 0.690 |       |                                  | SO0774       | 5-formyltetrahydrofolate cyclo-ligase family protein         | RF00013 6S RNA                                                  | Rfam                   |
| 134  | <b>24348931</b> | 0.981 | 0.432 |       |                                  | SO2842       | peptidase, M23/M37 family                                    |                                                                 |                        |
| 135  | <b>24350327</b> | 0.980 | 0.029 | Q     | - A                              | SO3987       | conserved hypothetical protein                               |                                                                 |                        |
| 136  | <b>24349297</b> | 0.980 | 0.850 |       | - A                              | etfB         | electron transfer flavoprotein, beta subunit                 |                                                                 |                        |
| 137  | <b>24346527</b> | 0.980 | 0.378 |       |                                  | nhaD         | Na <sup>+</sup> /H <sup>+</sup> antiporter                   |                                                                 |                        |

**Table S2.** Top 166 predicted regulatory RNAs by RSSVM (continued 7).

| Rank | GI              | RSSVM | RNAz  | QRNA | Terminator (T)<br>Attenuator (A) | Gene<br>Name | Gene Product                                 | Knowledge of<br>Regulation                                                        | Reference                 |
|------|-----------------|-------|-------|------|----------------------------------|--------------|----------------------------------------------|-----------------------------------------------------------------------------------|---------------------------|
| 138  | <b>24348231</b> | 0.979 | 0.402 |      |                                  | ibpA         | 16 kDa heat shock protein A                  |                                                                                   |                           |
| 139  | <b>24347681</b> | 0.978 | 0.423 |      |                                  | SO1844       | extracellular nuclease, putative             |                                                                                   |                           |
| 140  | <b>24349463</b> | 0.978 | 0.966 | Q    |                                  | SO3278       | conserved hypothetical protein               |                                                                                   |                           |
| 141  | <b>24348630</b> | 0.977 | 0.006 | Q    |                                  | SO2591       | conserved hypothetical protein               |                                                                                   |                           |
| 142  | <b>24350000</b> | 0.977 | 0.410 |      |                                  | SO3715       | oxygen-insensitive NAD(P)H<br>nitroreductase |                                                                                   |                           |
| 143  | <b>24350064</b> | 0.976 | 0.858 | Q    | T A                              | SO3770       | conserved hypothetical protein<br>TIGR00153  |                                                                                   |                           |
| 144  | <b>24351130</b> | 0.975 | 0.277 |      | - A                              | SO4628       | sulfatase                                    |                                                                                   |                           |
| 145  | <b>24346130</b> | 0.975 | 0.040 |      |                                  | crp          | catabolite gene activator                    |                                                                                   |                           |
| 146  | <b>24346384</b> | 0.972 | 0.342 |      |                                  | SO0826       | conserved hypothetical protein               |                                                                                   |                           |
| 147  | <b>24347716</b> | 0.972 | 0.456 |      | T -                              | speA         | biosynthetic arginine<br>decarboxylase       | Possible post-<br>transcriptional<br>regulation in <i>S.</i><br><i>oneidensis</i> | (Yang <i>et al.</i> 2008) |
| 148  | <b>24348388</b> | 0.971 | 0.017 |      |                                  | cmk          | cytidylate kinase                            |                                                                                   |                           |
| 149  | <b>24347035</b> | 0.971 | 0.393 |      |                                  | SO1328       | transcriptional regulator, LysR<br>family    |                                                                                   |                           |
| 150  | <b>24350162</b> | 0.971 | 0.796 |      | T A                              | sfcA         | malate oxidoreductase                        |                                                                                   |                           |
| 151  | <b>24349576</b> | 0.971 | 0.367 |      |                                  | SO3367       | conserved hypothetical protein<br>TIGR00091  |                                                                                   |                           |
| 152  | <b>24345923</b> | 0.970 | 0.418 |      |                                  | fkbp-1       | peptidyl-prolyl cis-trans<br>isomerase FkbP  |                                                                                   |                           |
| 153  | <b>24351092</b> | 0.967 | 0.333 |      | T A                              | SO4600       | antigen, putative                            |                                                                                   |                           |
| 154  | <b>24345880</b> | 0.967 | 0.415 |      | T A                              | ampD         | AmpD protein                                 |                                                                                   |                           |
| 155  | <b>24349361</b> | 0.965 | 0.450 |      |                                  | SO3193       | polysaccharide biosynthesis<br>protein       |                                                                                   |                           |
| 156  | <b>24350020</b> | 0.964 | 0.413 |      | - A                              | SO3733       | hypothetical protein                         |                                                                                   |                           |
| 157  | <b>24346579</b> | 0.964 | 0.136 |      |                                  | SO0975       | hypothetical protein                         |                                                                                   |                           |
| 158  | <b>24348690</b> | 0.961 | 0.426 |      |                                  | SO2639       | hypothetical protein                         |                                                                                   |                           |



**Table S2.** Top 166 predicted regulatory RNAs by RSSVM (continued 8).

| Rank | GI              | RSSVM | RNAz  | QRNA | Terminator (T)<br>Attenuator (A) | Gene<br>Name | Gene Product                                              | Knowledge of<br>Regulation | Reference |
|------|-----------------|-------|-------|------|----------------------------------|--------------|-----------------------------------------------------------|----------------------------|-----------|
| 159  | <b>24345372</b> | 0.960 | 0.440 |      | T A                              | SO0019       | conserved hypothetical protein                            |                            |           |
| 160  | <b>24350679</b> | 0.959 | 0.376 |      |                                  | folE         | GTP cyclohydrolase I                                      |                            |           |
| 161  | <b>24347079</b> | 0.958 | 0.524 |      |                                  | aroF         | phospho-2-dehydro-3-deoxyheptonate aldolase, tyrsensitive |                            |           |
| 162  | <b>24348818</b> | 0.957 | 0.191 |      |                                  | SO2742       | sensor histidine kinase/response regulator                |                            |           |
| 163  | <b>24349925</b> | 0.956 | 0.102 |      |                                  | rplU         | ribosomal protein L21                                     |                            |           |
| 164  | <b>24348689</b> | 0.954 | 0.897 |      | T A                              | ldh          | leucine dehydrogenase                                     |                            |           |
| 165  | <b>24346880</b> | 0.954 | 0.623 |      | - A                              | SO1210       | TPR domain protein                                        |                            |           |
| 166  | <b>24349795</b> | 0.953 | 0.409 |      | - A                              | SO3545       | OmpA family protein                                       |                            |           |

<sup>a</sup>. “Q” represents QRNA predictions that fit the “RNA” model in at least two pairwise alignments. “FP” indicates that the shuffled sequences were also identified as “RNA” by QRNA.

## References

- Beliaev AS, Thompson DK, Khare T, Lim H, Brandt CC et al. (2002) Gene and protein expression profiles of *Shewanella oneidensis* during anaerobic growth with different electron acceptors. *Omics* 6(1): 39-60.
- Cheung AY, Watson L, Soll D (1985) Two control systems modulate the level of glutaminyl-tRNA synthetase in *Escherichia coli*. *Journal of bacteriology* 161(1): 212-218.
- Chow J, Dennis PP (1994) Coupling between mRNA synthesis and mRNA stability in *Escherichia coli*. *Molecular microbiology* 11(5): 919-931.
- Ishihama A, Fukuda R (1980) Autogenous and post-transcriptional regulation of RNA polymerase synthesis. *Molecular and cellular biochemistry* 31(3): 177-196.
- Jiang GR, Nikolova S, Clark DP (2001) Regulation of the *ldhA* gene, encoding the fermentative lactate dehydrogenase of *Escherichia coli*. *Microbiology (Reading, England)* 147(Pt 9): 2437-2446.
- Maier TM, Myers CR (2004) The outer membrane protein Omp35 affects the reduction of Fe(III), nitrate, and fumarate by *Shewanella oneidensis* MR-1. *BMC microbiology* 4: 23.
- Membrillo-Hernandez J, Lin EC (1999) Regulation of expression of the *adhE* gene, encoding ethanol oxidoreductase in *Escherichia coli*: transcription from a downstream promoter and regulation by *fnr* and *RpoS*. *Journal of bacteriology* 181(24): 7571-7579.
- Ogasawara H, Ishida Y, Yamada K, Yamamoto K, Ishihama A (2007) PdhR (pyruvate dehydrogenase complex regulator) controls the respiratory electron transport system in *Escherichia coli*. *Journal of bacteriology* 189(15): 5534-5541.
- Steward KL, Linn T (1992) Transcription frequency modulates the efficiency of an attenuator preceding the *rpoBC* RNA polymerase genes of *Escherichia coli*: possible autogenous control. *Nucleic acids research* 20(18): 4773-4779.

- Vitreschak AG, Lyubetskaya EV, Shirshin MA, Gelfand MS, Lyubetsky VA (2004) Attenuation regulation of amino acid biosynthetic operons in proteobacteria: comparative genomics analysis. *FEMS microbiology letters* 234(2): 357-370.
- Weinberg Z, Barrick JE, Yao Z, Roth A, Kim JN et al. (2007) Identification of 22 candidate structured RNAs in bacteria using the CMfinder comparative genomics pipeline. *Nucleic Acids Res* 35(14): 4809-4819.
- Yang Y, Harris DP, Luo F, Wu L, Parsons AB et al. (2008) Characterization of the *Shewanella oneidensis* Fur gene: roles in iron and acid tolerance response. *BMC genomics* 9 Suppl 1: S11.
- Yao Z, Barrick J, Weinberg Z, Neph S, Breaker R et al. (2007) A computational pipeline for high-throughput discovery of cis-regulatory noncoding RNA in prokaryotes. *PLoS computational biology* 3(7): e126.
- Zurawski G, Gunsalus RP, Brown KD, Yanofsky C (1981) Structure and regulation of aroH, the structural gene for the tryptophan-repressible 3-deoxy-D-arabino-heptulosonic acid-7-phosphate synthetase of *Escherichia coli*. *Journal of molecular biology* 145(1): 47-73.
