# Supplementary material for: Discovering cis-Regulatory RNAs in Shewanella Genomes by Support Vector Machines
Source: PubMed Central journal article supplement (PMC2659441; doi:10.1371/journal.pcbi.1000338), 2009-04-03
Supplement: pcbi.1000338.s010.pdf [file pcbi.1000338.s010.pdf]

**Table S3.** Comparisons between different RNA motif identification algorithms.

|                      | RSSVM                                                                     | RNAz                                                       | Dynalign+LIBSVM                                                                               | QRNA                                  |
|----------------------|---------------------------------------------------------------------------|------------------------------------------------------------|-----------------------------------------------------------------------------------------------|---------------------------------------|
| Structure prediction | RNA Sampler                                                               | RNAalifold                                                 | Dynalign                                                                                      | N/A                                   |
| Algorithm            | SVM                                                                       | SVM                                                        | SVM                                                                                           | Probabilistic Model                   |
| Input                | Unaligned sequences                                                       | Sequence alignments                                        | Two unaligned sequences                                                                       | Pairwise sequence alignments          |
| Feature vector       | $Z, SCI^a, I, MI, id, n$                                                  | $Z, SCI^a, id, n$                                          | $\Delta G_{total}, L, f_{seq1}^A, f_{seq1}^U, f_{seq1}^C, f_{seq2}^A, f_{seq2}^U, f_{seq2}^C$ | N/A                                   |
| Training sets        | All bacterial RNA motif families from Rfam<br>Sequence identity: 20% -90% | Rfam families from Rfam<br>Sequence identities: > 50%      | tRNAs and rRNAs                                                                               | tRNAs and rRNAs                       |
| Output               | Common RNA secondary structures, classification $P$ -value                | Common RNA secondary structures, classification $P$ -value | Common RNA secondary structures, classification $P$ -value                                    | Classification of RNA, Coding or Null |

<sup>a</sup>. The  $SCI$  score in RNAz is calculated from the common structure predicted by RNAalifold. It also considers covariance between base pairs. The  $SCI$  score in RSSVM is calculated from the common structure predicted by RNA Sampler.
